1 **Title**

2 Benchmarking saliency methods for chest X-ray interpretation

3

4 **Authors**

5 Adriel Saporta MS MBA<sup>1\*</sup>, Xiaotong Gui MS<sup>2\*</sup>, Ashwin Agrawal MS<sup>2\*</sup>, Anuj Pareek MD

6 PhD<sup>3</sup>, Steven QH Truong MBA<sup>4</sup>, Chanh DT Nguyen PhD<sup>4,5</sup>, Van-Doan Ngo MD<sup>6</sup>, Jayne

7 Seekins DO<sup>7</sup>, Francis G. Blankenberg MD<sup>7</sup>, Andrew Y. Ng PhD<sup>2</sup>, Matthew P. Lungren MD

8 MPH<sup>3</sup>, Pranav Rajpurkar PhD<sup>8</sup>

9

10 **Affiliations**

11 <sup>1</sup>Department of Computer Science, New York University, USA

12 <sup>2</sup>Department of Computer Science, Stanford University, USA

13 <sup>3</sup>Stanford Center for Artificial Intelligence in Medicine and Imaging, USA

14 <sup>4</sup>VinBrain, Vietnam

15 <sup>5</sup>VinUniversity, Vietnam

16 <sup>6</sup>Vinmec International Hospital, Vietnam

17 <sup>7</sup>Department of Radiology, Stanford University School of Medicine, USA

18 <sup>8</sup>Department of Biomedical Informatics, Harvard University, USA

19 \*These authors contributed equally: Adriel Saporta, Xiaotong Gui, Ashwin Agrawal

20

21 Corresponding author: Pranav Rajpurkar, PhD ([pranav\\_raipurkar@hms.harvard.edu](mailto:pranav_raipurkar@hms.harvard.edu))

22

23 Current word count: 4438

## 24 **Abstract**

25 Saliency methods, which “explain” deep neural networks by producing heat maps that  
26 highlight the areas of the medical image that influence model prediction, are often  
27 presented to clinicians as an aid in diagnostic decision-making. Although many saliency  
28 methods have been proposed for medical imaging interpretation, rigorous investigation  
29 of the accuracy and reliability of these strategies is necessary before they are integrated  
30 into the clinical setting. In this work, we quantitatively evaluate seven saliency methods—  
31 including Grad-CAM, Grad-CAM++, and Integrated Gradients—across multiple neural  
32 network architectures using two evaluation metrics. We establish the first human  
33 benchmark for chest X-ray segmentation in a multilabel classification set up, and examine  
34 under what clinical conditions saliency maps might be more prone to failure in localizing  
35 important pathologies compared to a human expert benchmark. We find that (i) while  
36 Grad-CAM generally localized pathologies better than the other evaluated saliency  
37 methods, all seven performed significantly worse compared with the human benchmark;  
38 (ii) the gap in localization performance between Grad-CAM and the human benchmark  
39 was largest for pathologies that had multiple instances, were smaller in size, and had  
40 shapes that were more complex; (iii) model confidence was positively correlated with  
41 Grad-CAM localization performance. While it is difficult to know whether poor localization  
42 performance is attributable to the model or to the saliency method, our work demonstrates  
43 that several important limitations of saliency methods must be addressed before we can  
44 rely on them for deep learning explainability in medical imaging.

45

## 46 **Introduction**

47 Deep learning has enabled automated medical imaging interpretation at the level of  
48 practicing experts in some settings<sup>1-3</sup>. While the potential benefits of automated  
49 diagnostic models are numerous, lack of model interpretability in the use of “black-box”  
50 deep neural networks (DNNs) represents a major barrier to clinical trust and adoption<sup>4-6</sup>.  
51 In fact, it has been argued that the European Union’s recently adopted General Data  
52 Protection Regulation (GDPR) affirms an individual’s right to an explanation in the context  
53 of automated decision-making<sup>7</sup>. Although the importance of DNN interpretability is widely  
54 acknowledged and many techniques have been proposed, little emphasis has been  
55 placed on how best to quantitatively evaluate these explainability methods<sup>8</sup>.

56  
57 One type of DNN interpretation strategy widely used in the context of medical imaging is  
58 based on saliency (or pixel-attribution) methods<sup>9-12</sup>. Saliency methods produce heat  
59 maps highlighting the areas of the medical image that most influenced the DNN’s  
60 prediction. Since saliency methods provide post-hoc interpretability of models that are  
61 never exposed to bounding box annotations or pixel-level segmentations during training,  
62 they are particularly useful in the context of medical imaging where ground-truth  
63 segmentations can be especially time-consuming and expensive to obtain. The heat  
64 maps help to visualize whether a DNN is concentrating on the same regions of a medical  
65 image that a human expert would focus on, rather than concentrating on a clinically  
66 irrelevant part of the medical image or even on confounders in the image<sup>13-15</sup>. Saliency  
67 methods have been widely used for a variety of medical imaging tasks and modalities  
68 including, but not limited to, visualizing the performance of a convolutional neural network  
69 (CNN) in predicting (1) myocardial infarction<sup>16</sup> and hypoglycemia<sup>17</sup> from

70 electrocardiograms, (2) visual impairment<sup>18</sup>, refractive error<sup>19</sup>, and anaemia<sup>20</sup> from retinal  
71 photographs, (3) long-term mortality<sup>21</sup> and tuberculosis<sup>22</sup> from chest X-ray (CXR) images,  
72 and (4) appendicitis<sup>23</sup> and pulmonary embolism<sup>24</sup> on computed tomography scans.  
73 However, recent work has shown that saliency methods used to validate model  
74 predictions can be misleading in some cases and may lead to increased bias and loss of  
75 user trust in high-stakes contexts such as healthcare<sup>25–28</sup>. Therefore, a rigorous  
76 investigation of the accuracy and reliability of these strategies is necessary before they  
77 are integrated into the clinical setting<sup>29</sup>.

78  
79 In this work, we perform a systematic evaluation of seven common saliency methods in  
80 medical imaging (Grad-CAM<sup>30</sup>, Grad-CAM++<sup>31</sup>, Integrated Gradients<sup>32</sup>, Eigen-CAM<sup>41</sup>,  
81 DeepLIFT<sup>42</sup>, Layer-Wise Relevance Propagation<sup>43</sup>, and Occlusion<sup>44</sup>) using three common  
82 CNN architectures (DenseNet121<sup>33</sup>, ResNet152<sup>34</sup>, Inception-v4<sup>35</sup>). In doing so, we  
83 establish the first human benchmark in CXR segmentation by collecting radiologist  
84 segmentations for 10 pathologies using CheXpert, a large publicly available CXR  
85 dataset<sup>36</sup>. To compare saliency method segmentations with expert segmentations, we  
86 use two metrics to capture localization accuracy: (1) *mean Intersection over Union*, a  
87 metric that measures the overlap between the saliency method segmentation and the  
88 expert segmentation, and (2) *hit rate*, a less strict metric than mIoU that does not require  
89 the saliency method to locate the full extent of a pathology. We find that (1) while Grad-  
90 CAM generally localizes pathologies more accurately than the other evaluated saliency  
91 methods, all seven perform significantly worse compared with a human radiologist  
92 benchmark (although it is difficult to know whether poor localization performance is

93 attributable to the model or to the saliency method); (2) the gap in localization  
94 performance between Grad-CAM and the human benchmark is largest for pathologies  
95 that have multiple instances on the same CXR, are smaller in size, and have shapes that  
96 are more complex; (3) model confidence is positively correlated with Grad-CAM  
97 localization performance. We publicly release a development dataset of expert  
98 segmentations, which we call CheXlocalize, to facilitate further research in DNN  
99 explainability for medical imaging.

100

## 101 **Results**

### 102 **Framework for evaluating saliency methods**

103 Seven methods were evaluated—Grad-CAM, Grad-CAM++, Integrated Gradients, Eigen-  
104 CAM, DeepLIFT, Layer-Wise Relevance Propagation (LRP), and Occlusion—in a multi-  
105 label classification setup on the CheXpert dataset (Fig. 1a). We ran experiments using  
106 three CNN architectures previously used on CheXpert: DenseNet121, ResNet152, and  
107 Inception-v4. For each combination of saliency method and model architecture, we  
108 trained and evaluated an ensemble of 30 CNNs (see Methods for ensembling details).  
109 We then passed each of the CXRs in the dataset’s holdout test set into the trained  
110 ensemble model to obtain image-level predictions for the following 10 pathologies:  
111 Atelectasis, Cardiomegaly, Consolidation, Edema, Enlarged Cardiomedastinum, Lung  
112 Lesion, Lung Opacity, Pleural Effusion, Pneumothorax, and Support Devices. Of the 14  
113 observations labeled in the CheXpert dataset: Fracture and Pleural Other were not  
114 included in our analysis because they had low prevalence in our test set (fewer than 10  
115 examples); Pneumonia was not included because it is a clinical (as opposed to a

116 radiological) diagnosis; and No Finding was not included because it is not applicable to  
117 evaluating localization performance. For each CXR, we used the saliency method to  
118 generate heat maps, one for each of the 10 pathologies, and then applied a threshold to  
119 each heat map to produce binary segmentations (top row, Fig. 1a). Thresholding is  
120 determined per pathology using Otsu's method<sup>37</sup>, which iteratively searches for a  
121 threshold value that maximizes inter-class pixel intensity variance. We also conducted a  
122 second thresholding scheme in which we iteratively search for a threshold value that  
123 maximizes per pathology mIoU on the validation set. Both thresholding schemes reported  
124 similar findings (see Extended Data Fig. 1). The result shows that our evaluation of  
125 localization performance is robust to different saliency map thresholding schemes.  
126 Additionally, to calculate the hit rate evaluation metric (described below), we extracted  
127 the pixel in the saliency method heat map with the largest value as the single most  
128 representative point on the CXR for that pathology.

129  
130 We obtained two independent sets of pixel-level CXR segmentations on the holdout test  
131 set: ground-truth segmentations drawn by two board-certified radiologists (middle row,  
132 Fig. 1a) and human benchmark segmentations drawn by a separate group of three board-  
133 certified radiologists (bottom row, Fig. 1a). The human benchmark segmentations and the  
134 saliency method segmentations were compared with the ground-truth segmentations to  
135 establish the human benchmark localization performance and the saliency method  
136 localization performance, respectively. Additionally, for the hit rate evaluation metric, the  
137 radiologists who drew the benchmark segmentations were also asked to locate a single  
138 point on the CXR that was most representative of the pathology at hand (see

139 Supplementary Figs. S1 through S11 for detailed instructions given to the radiologists).  
140 Note that the human benchmark localization performance demonstrates interrater  
141 variability, and we use it as a reference when evaluating saliency method pipelines.

142  
143 We used two evaluation metrics to compare segmentations (Fig. 1b). First, we used *mean*  
144 *Intersection over Union* (mIoU), a metric that measures how much, on average, either the  
145 saliency method or benchmark segmentations overlapped with the ground-truth  
146 segmentations. Second, we used *hit rate*, a less strict metric that does not require the  
147 saliency method or benchmark annotators to locate the full extent of a pathology. Hit rate  
148 is based on the pointing game setup<sup>38</sup>, in which credit is given if the most representative  
149 point identified by the saliency method or the benchmark annotators lies within the  
150 ground-truth segmentation. A “hit” indicates that the correct region of the CXR was  
151 located regardless of the exact bounds of the binary segmentations. Localization  
152 performance is then calculated as the hit rate across the dataset<sup>39</sup>. In addition, we report  
153 the sensitivity and specificity values of the saliency method pipeline and the human  
154 benchmark in Extended Data Fig. 2.

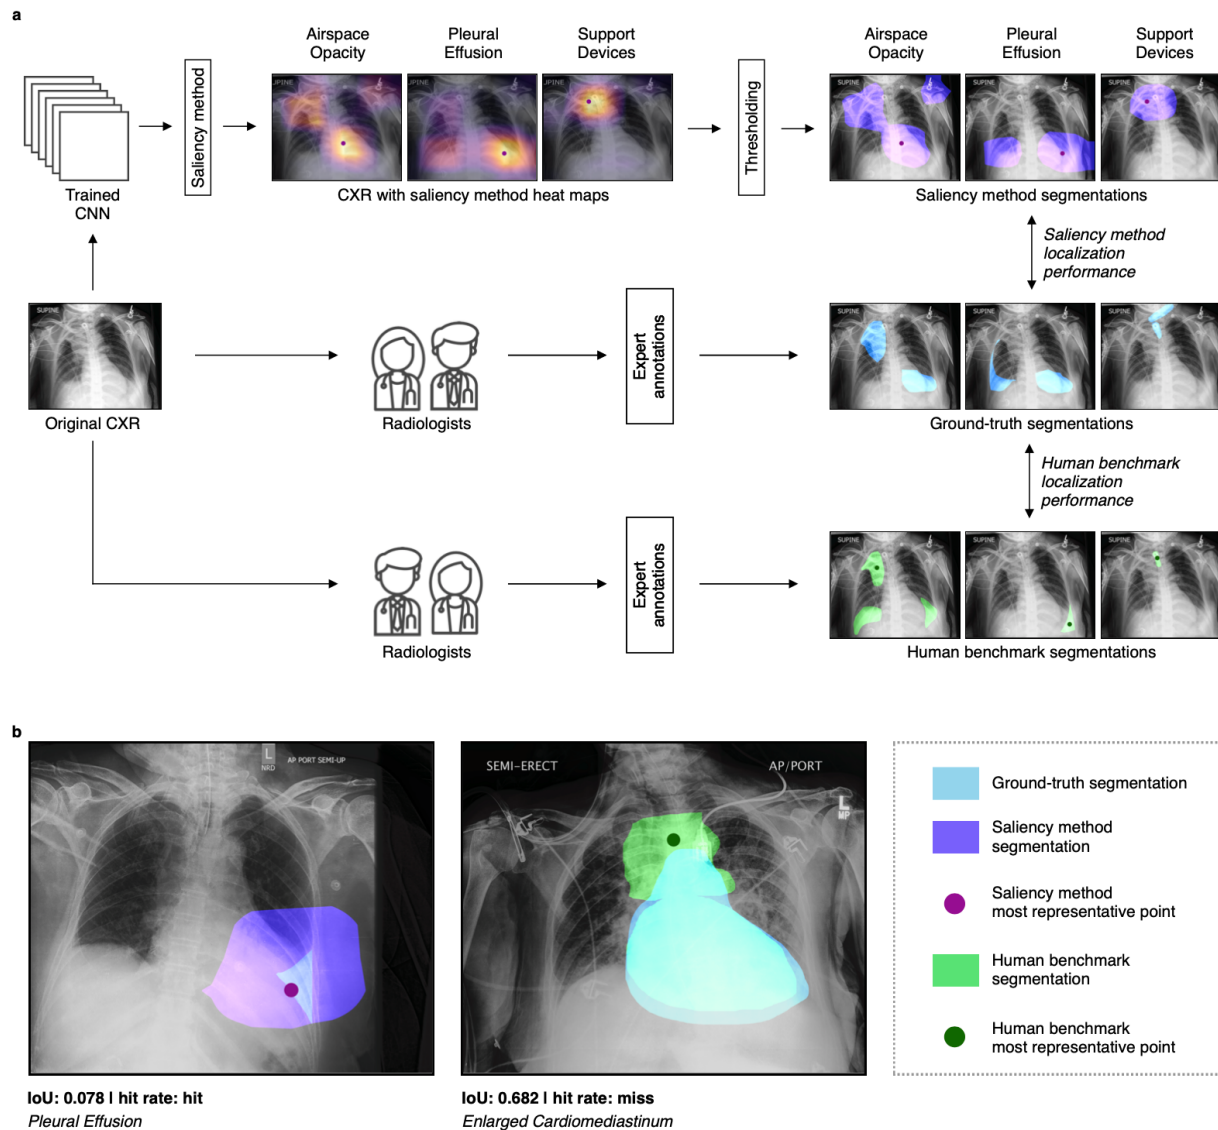

155

156 **Fig. 1 | Framework for evaluating saliency methods.** a, Top row left: a CXR image  
 157 from the holdout test set is passed into an ensemble CNN trained only on CXR images  
 158 and their corresponding pathology task labels. Saliency method is used to generate 10  
 159 heat maps for the example CXR, one for each task. The pixel in the heat map with the  
 160 largest value is determined to be the single most representative point on the CXR for  
 161 that pathology. Top row middle: there are three pathologies present in this CXR (Airspace  
 162 Opacity, Pleural Effusion, and Support Devices). Top row right: a threshold is applied to  
 163 the heat maps to produce binary segmentations for each present pathology. Middle row:  
 164 Two board-certified radiologists were asked to segment the pathologies that were  
 165 present in the CXR as determined by the dataset’s ground-truth labels. Saliency method  
 166 annotations are compared to these ground-truth annotations to determine “saliency  
 167 method localization performance”. Bottom row: Two board-certified radiologists  
 168 (separate from those in middle row) were also asked to segment the pathologies that  
 169 were present in the CXR as determined by the dataset’s ground-truth labels. In addition,



170 these radiologists were asked to locate the single point on the CXR that was most  
171 representative of each present pathology. These benchmark annotations are compared  
172 to the ground-truth annotations to determine “human benchmark localization  
173 performance”. **b**, Left: CXR with ground-truth and saliency method annotations for  
174 Pleural Effusion. The segmentations have a low overlap (IoU is 0.078), but pointing game  
175 is a “hit” since the saliency method’s most representative point is inside of the ground-  
176 truth segmentation. Right, CXR with ground-truth and human benchmark annotations  
177 for Enlarged Cardiomeastinum. The segmentations have a high overlap (IoU is 0.682),  
178 but pointing game is a “miss” since saliency method’s most representative point is  
179 outside of the ground-truth segmentation.

180

## 181 **Evaluating localization performance**

182 In order to compare the localization performance of the saliency methods with the human  
183 benchmark, we first used Grad-CAM, Grad-CAM++, and Integrated Gradients to run  
184 eighteen experiments, one for each combination of saliency method (Grad-CAM, Grad-  
185 CAM++, or Integrated Gradients) and CNN architecture (DenseNet121, ResNet152, or  
186 Inception-v4) using one of the two evaluation metrics (mIoU or hit rate) (see Extended  
187 Data Fig. 3). We also ran experiments to evaluate the localization performances of  
188 DenseNet121 with Eigen-CAM, DeepLIFT, LRP, and Occlusion. We found that Grad-  
189 CAM with DenseNet121 generally demonstrated better localization performance across  
190 pathologies and evaluation metrics than the other combinations of saliency method and  
191 architecture (see Table 1 for localization performance on the test set of all seven saliency  
192 methods using DenseNet121). Accordingly, we compared Grad-CAM with DenseNet121  
193 (“saliency method pipeline”) with the human benchmark using both mIoU and hit rate. The  
194 localization performance for each pathology is reported on the true positive slice of the  
195 dataset (CXR that contain saliency method, human benchmark, and ground-truth  
196 segmentations). Localization performance was calculated this way so that saliency  
197 methods were not penalized by DNN classification error: while the benchmark radiologists

198 were provided with ground-truth labels when annotating the dataset, saliency method  
 199 segmentations were created based on labels predicted by the model. (See Extended Data  
 200 Fig. 4 for saliency method pipeline localization performance on the full dataset using  
 201 mIoU.)

**Table 1 | Localization performance of saliency methods using DenseNet121**

| Pathology         | Grad-CAM | Grad-CAM++ | Integrated Gradients | Eigen-CAM | DeepLIFT | LRP   | Occlusion |
|-------------------|----------|------------|----------------------|-----------|----------|-------|-----------|
| <b>mIoU</b>       |          |            |                      |           |          |       |           |
| Airspace Opacity  | 0.248    | 0.234      | 0.123                | 0.293     | 0.111    | 0.112 | 0.242     |
| Atelectasis       | 0.254    | 0.245      | 0.116                | 0.267     | 0.126    | 0.109 | 0.250     |
| Cardiomegaly      | 0.452    | 0.346      | 0.160                | 0.379     | 0.167    | 0.150 | 0.312     |
| Consolidation     | 0.408    | 0.297      | 0.177                | 0.332     | 0.088    | 0.099 | 0.212     |
| Edema             | 0.362    | 0.388      | 0.073                | 0.370     | 0.059    | 0.047 | 0.347     |
| Enlarged Cardiom. | 0.379    | 0.400      | 0.154                | 0.372     | 0.109    | 0.117 | 0.363     |
| Lung Lesion       | 0.101    | 0.089      | 0.107                | 0.089     | 0.072    | 0.088 | 0.087     |
| Pleural Effusion  | 0.235    | 0.195      | 0.088                | 0.249     | 0.090    | 0.082 | 0.215     |
| Pneumothorax      | 0.213    | 0.218      | 0.077                | 0.218     | 0.084    | 0.066 | 0.214     |
| Support Devices   | 0.163    | 0.133      | 0.099                | 0.116     | 0.086    | 0.052 | 0.126     |
| <b>Hit rate</b>   |          |            |                      |           |          |       |           |
| Airspace Opacity  | 0.498    | 0.558      | 0.606                | 0.566     | 0.528    | 0.566 | 0.367     |
| Atelectasis       | 0.501    | 0.621      | 0.520                | 0.530     | 0.415    | 0.468 | 0.343     |
| Cardiomegaly      | 0.903    | 0.732      | 0.697                | 0.709     | 0.610    | 0.644 | 0.515     |
| Consolidation     | 0.738    | 0.708      | 0.624                | 0.626     | 0.571    | 0.283 | 0.338     |
| Edema             | 0.746    | 0.781      | 0.300                | 0.758     | 0.468    | 0.156 | 0.469     |
| Enlarged Cardiom. | 0.818    | 0.630      | 0.704                | 0.612     | 0.469    | 0.594 | 0.767     |
| Lung Lesion       | 0.290    | 0.290      | 0.423                | 0.146     | 0.497    | 0.356 | 0.072     |
| Pleural Effusion  | 0.507    | 0.347      | 0.332                | 0.439     | 0.408    | 0.283 | 0.291     |
| Pneumothorax      | 0.392    | 0.489      | 0.801                | 0.195     | 0.801    | 0.697 | 0.297     |
| Support Devices   | 0.355    | 0.364      | 0.491                | 0.216     | 0.598    | 0.264 | 0.189     |

202 We found that the saliency method pipeline demonstrated significantly worse localization  
 203 performance when compared with the human benchmark using both mIoU (Fig. 2a) and  
 204 hit rate (Fig. 2b) as an evaluation metric, regardless of model classification AUROC. For  
 205 each metric, we report the 95% confidence intervals using the bootstrap method with  
 206 1,000 bootstrap samples<sup>40</sup>. For five of the 10 pathologies, the saliency method pipeline  
 207

208 had a significantly lower mIoU than the human benchmark. For example, the saliency  
209 method pipeline had one of the highest AUROC scores of the 10 pathologies for Support  
210 Devices (0.969), but had among the worst localization performance for Support Devices  
211 when using both mIoU (0.163 [95% CI 0.154, 0.172]) and hit rate (0.357 [95% CI 0.303,  
212 0.408]) as evaluation metrics. On two pathologies (Atelectasis and Consolidation) the  
213 saliency method pipeline significantly outperformed the human benchmark. On average,  
214 across all 10 pathologies, mIoU saliency method pipeline performance was 26.6% [95%  
215 CI 18.1%, 35.0%] worse than the human benchmark, with Lung Lesion displaying the  
216 largest gap in performance (76.2% [95% CI 59.1%, 87.5%] worse than the human  
217 benchmark) (Extended Data Fig. 5). Consolidation was the pathology on which the mIoU  
218 saliency method pipeline performance exceeded the human benchmark the most, by  
219 56.1% [95% CI 42.7%, 69.4%]. For seven of the 10 pathologies, the saliency method  
220 pipeline had a significantly lower hit rate than the human benchmark. On average, hit rate  
221 saliency method pipeline performance was 29.4% [95% CI 15.0%, 43.2%] worse than the  
222 human benchmark (Extended Data Fig. 6), with Lung Lesion again displaying the largest  
223 gap in performance (65.9% [95% CI 35.3%, 91.7%] worse than the human benchmark).  
224 The hit rate saliency method pipeline did not significantly outperform the human  
225 benchmark on any of the 10 pathologies; for the remaining three of the 10 pathologies,  
226 the hit rate performance differences between the saliency method pipeline and the human  
227 benchmark were not statistically significant. Therefore, while the saliency method pipeline  
228 significantly underperformed the human benchmark regardless of evaluation metric used,  
229 the average performance gap was larger when using hit rate as an evaluation metric than  
230 when using mIoU as an evaluation metric.

231  
 232 We compared saliency method pipeline localization performance using an ensemble  
 233 model to localization performance using the top performing single checkpoint for each  
 234 pathology. We found that the single model has worse localization performance than the  
 235 ensemble model for all pathologies when using mIoU and for six of the 10 pathologies  
 236 when using hit rate (see Extended Data Fig. 7).

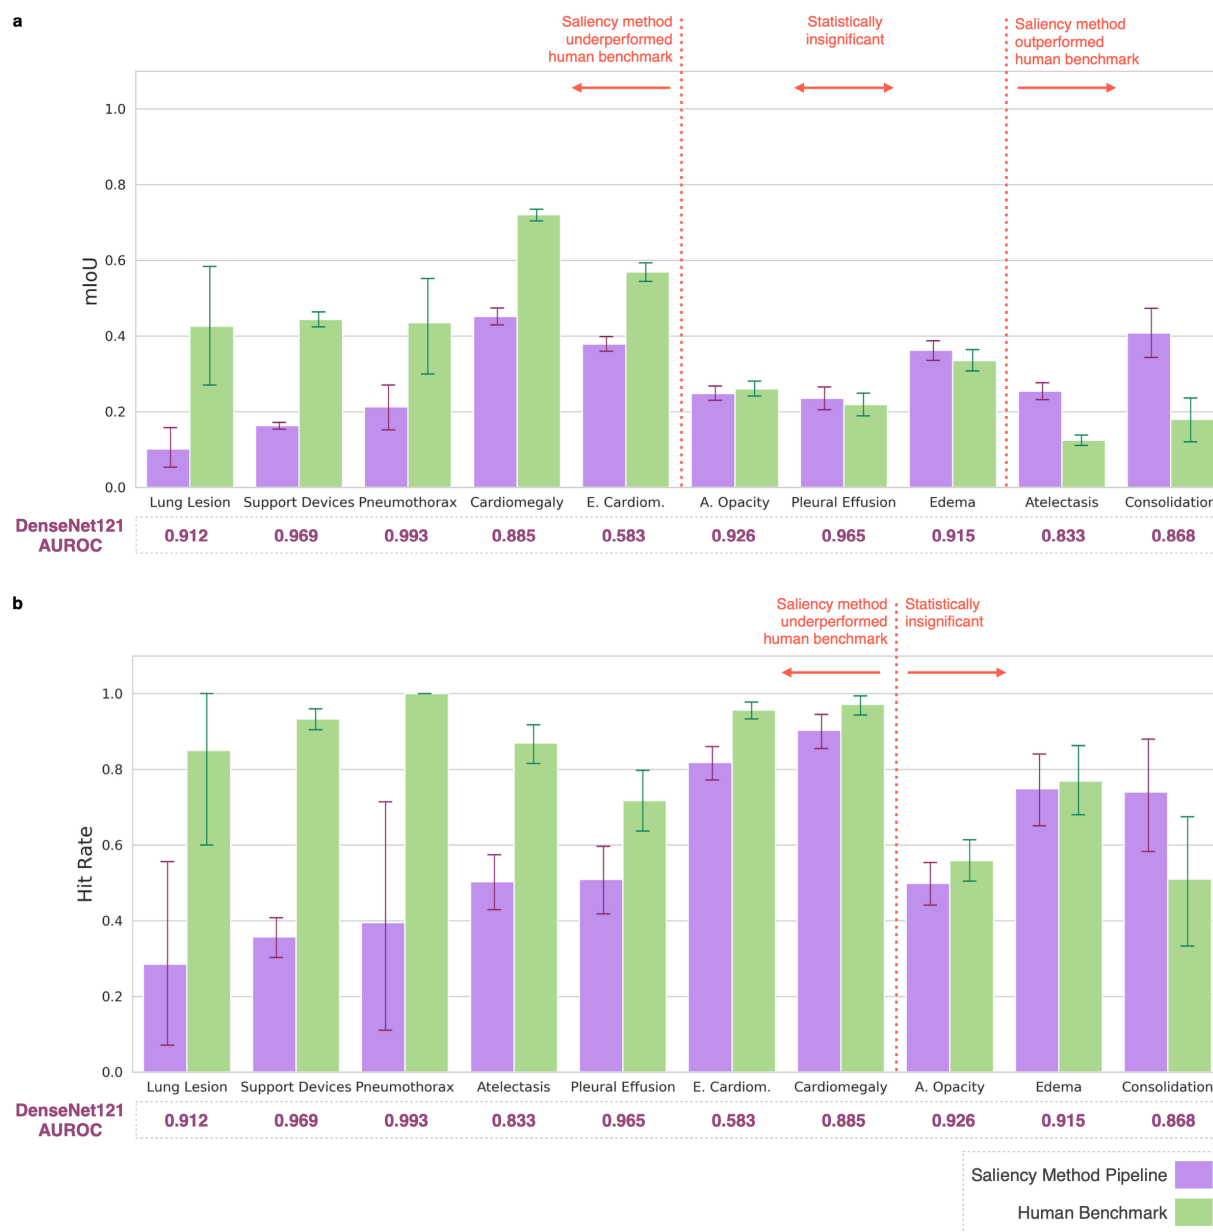

238 **Fig. 2 | Evaluating localization performance. a**, Comparing saliency method pipeline  
239 and human benchmark localization performances under the overlap evaluation scheme  
240 (mIoU). **b**, Comparing saliency method pipeline and human benchmark localization  
241 performances under the hit rate evaluation scheme. For both **a** and **b**, pathologies, along  
242 with their DenseNet121 AUROCs, are sorted on the x-axis first by statistical significance  
243 of percentage decrease from human benchmark mIoU/hit rate to saliency method  
244 pipeline mIoU/hit rate (high to low), and then by percentage decrease from human  
245 benchmark mIoU/hit rate to saliency method pipeline mIoU/hit rate (high to low).  
246

## 247 **Characterizing underperformance of saliency method pipeline**

248 In order to better understand the underperformance of the saliency method pipeline  
249 localization, we first conducted a qualitative analysis with a radiologist by visually  
250 inspecting both the segmentations produced by the saliency method pipeline (Grad-CAM  
251 with DenseNet121) and the human benchmark segmentations. We found that, in general,  
252 saliency method segmentations fail to capture the geometric nuances of a given  
253 pathology, and instead produce coarse, low-resolution heat maps. Specifically, our  
254 qualitative analysis found that the performance of the saliency method depended on three  
255 pathological characteristics (Fig. 3a): (1) *number of instances*: when a pathology had  
256 multiple instances on a CXR, the saliency method segmentation often highlighted one  
257 large confluent area, instead of highlighting each distinct instance of the pathology  
258 separately; (2) *size*: saliency method segmentations tended to be significantly larger than  
259 human expert segmentations, often failing to respect clear anatomical boundaries; (3)  
260 *shape complexity*: the saliency method segmentations for pathologies with complex  
261 shapes frequently included significant portions of the CXR where the pathology is not  
262 present.

263

264 Informed by our qualitative analysis and previous work in histology<sup>45</sup>, we defined four  
265 geometric features for our quantitative analysis (Fig. 3b): (1) *number of instances* (for  
266 example, bilateral Pleural Effusion would have two instances, whereas there is only one  
267 instance for Cardiomegaly), (2) *size* (pathology area with respect to the area of the whole  
268 CXR), (3) *elongation* and (4) *irrectangularity* (the last two features measure the complexity  
269 of the pathology shape and were calculated by fitting a rectangle of minimum area  
270 enclosing the binary mask). See Extended Data Fig. 8 for the distribution of the four  
271 pathological characteristics across all 10 pathologies.

272  
273 For each evaluation metric, we ran 8 simple linear regressions: four with the evaluation  
274 metric (IoU or hit rate) of the saliency method pipeline (Grad-CAM with DenseNet121) as  
275 the dependent variable (to understand the relationship between the geometric features of  
276 a pathology and saliency method localization performance), and four with the difference  
277 between the evaluation metrics of the saliency method pipeline and the human  
278 benchmark as the dependent variable (to understand the relationship between the  
279 geometric features of a pathology and the gap in localization performance between the  
280 saliency method pipeline and the human benchmark). Each regression used one of the  
281 four geometric features as a single independent variable, and only the true positive slice  
282 was included in each regression. Each feature was normalized using z-score  
283 normalization and the regression coefficient can be interpreted as the effect of that  
284 geometric feature on the evaluation metric at hand. See Table 2 for coefficients from the  
285 regressions using both evaluation metrics, where we also report the 95% confidence

286 interval and the Bonferroni corrected p-values. For confidence intervals and p-values, we  
 287 used the standard calculation for linear models.

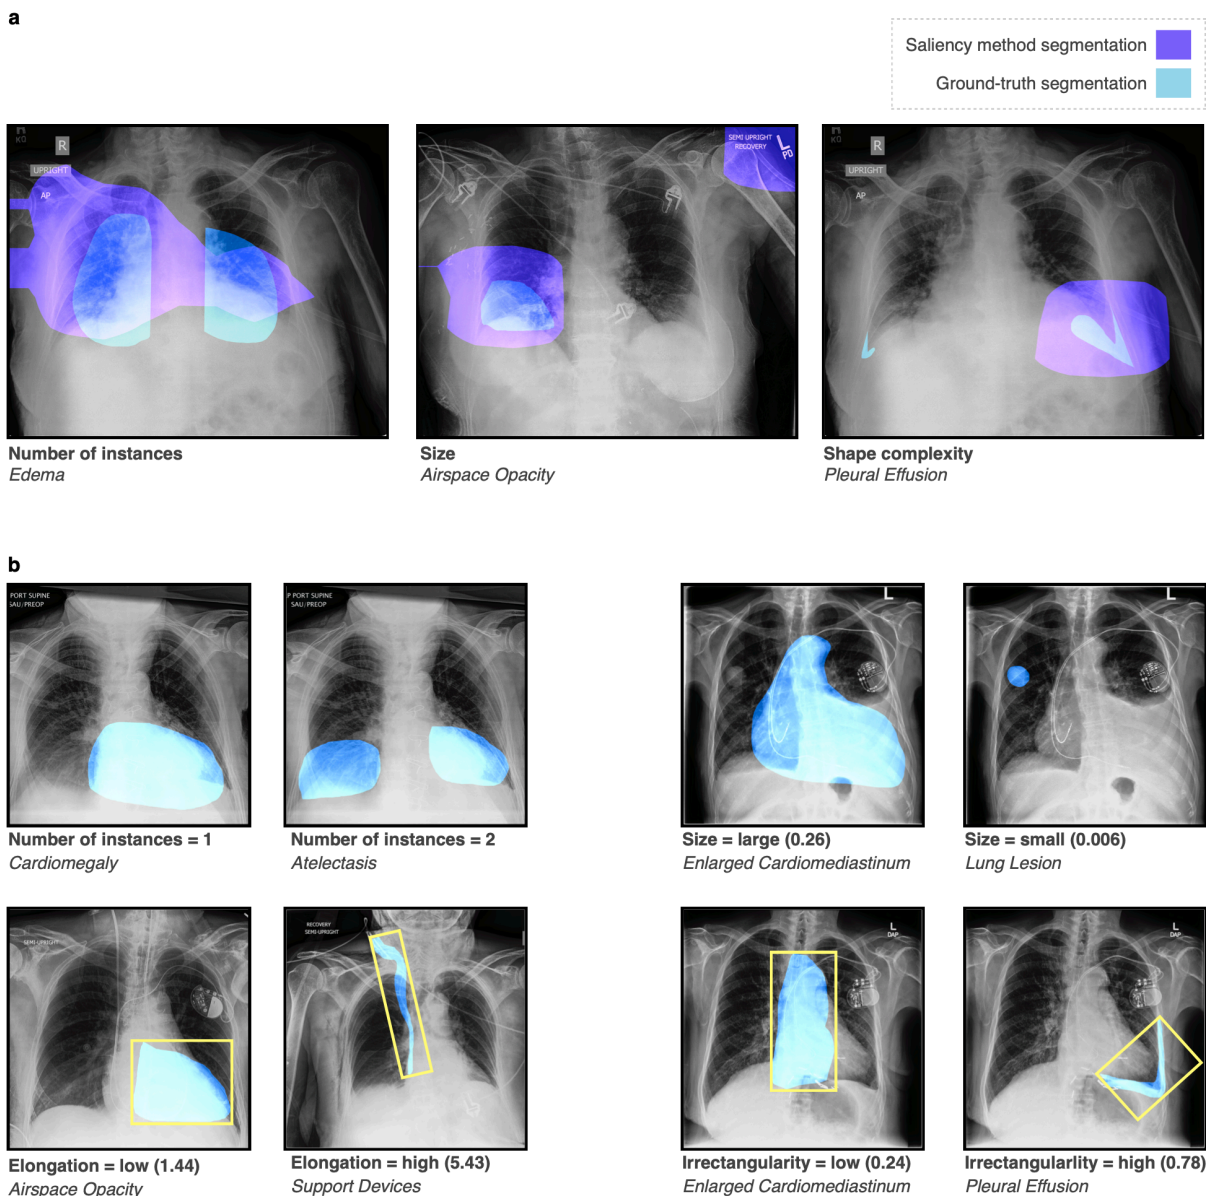

288

289 **Fig. 3 | Characterizing underperformance of saliency method pipeline.** **a**, Example  
 290 CXRs that highlight the three pathological characteristics identified by our qualitative  
 291 analysis: (1) Left, number of instances; (2) Middle, size; and (3) Right, shape complexity.  
 292 **b**, Example CXRs with the four geometric features used in our quantitative analysis: (1)  
 293 Top row left, number of instances; (2) Top row right, size = area of segmentation/area of  
 294 CXR; (3) Bottom row left, elongation; and (4) Bottom row right, irrectangularity.  
 295 Elongation and irrectangularity were calculated by fitting a rectangle of minimum area  
 296 enclosing the binary mask (as indicated by the yellow rectangles). Elongation =

297 maxAxis/minAxis. Irrectangularity =  $1 - (\text{area of segmentation}/\text{area of enclosing}$   
298  $\text{rectangle})$ .  
299

300 Our statistical analysis showed that as the area ratio of a pathology increased, mIoU  
301 saliency method localization performance improved (0.566 [95% CI 0.526, 0.606]). We  
302 also found that as elongation and irrectangularity increased, mIoU saliency method  
303 localization performance worsened (elongation: -0.425 [95% CI -0.497, -0.354],  
304 irrectangularity: -0.256 [95% CI -0.292, -0.219]). We observed that the effects of these  
305 three geometric features were similar for hit rate saliency method localization  
306 performance in terms of levels of statistical significance and direction of the effects.  
307 However, there was no evidence that the number of instances of a pathology had a  
308 significant effect on either mIoU (-0.115 [95% CI -0.220, -0.009]) or hit rate (-0.051 [95%  
309 CI -0.364, 0.244]) saliency method localization. Therefore, regardless of evaluation  
310 metric, saliency method localization performance suffered in the presence of pathologies  
311 that were small in size and complex in shape.

312

313 We found that these same three pathological characteristics—larger size, and higher  
314 elongation and irrectangularity—characterized the *gap* in mIoU localization performance  
315 between saliency method and human benchmark. We observed that the *gap* in hit rate  
316 localization performance was significantly characterized by all four geometric features  
317 (number of instances, size, elongation, and irrectangularity). As the number of instances  
318 increased, despite no significant change in hit rate localization performance itself, the *gap*  
319 in hit rate localization performance between saliency method and the human benchmark



320 increased (0.470 [95% CI 0.114, 0.825]). This suggests that the saliency method performs  
 321 especially poorly in the face of a multi-instance diagnosis.

**Table 2 | Coefficients from regressions on geometric features of pathologies**

| Geometric feature<br>(independent variable) | Coefficient using<br>saliency method localization<br>(dependent variable) | Coefficient using localization difference<br>(human benchmark - saliency method)<br>(dependent variable) |
|---------------------------------------------|---------------------------------------------------------------------------|----------------------------------------------------------------------------------------------------------|
| <b>IoU</b>                                  |                                                                           |                                                                                                          |
| Number of instances                         | -0.115 (-0.220, -0.009)                                                   | -0.072 (-0.237, -0.094)                                                                                  |
| Size                                        | 0.566 (0.526, 0.606) ***                                                  | -0.154 (-0.231, -0.076) ***                                                                              |
| Elongation                                  | -0.425 (-0.497, -0.354) ***                                               | 0.476 (0.362, 0.589) ***                                                                                 |
| Irrectangularity                            | -0.256 (-0.292 -0.219) ***                                                | 0.307 (0.249, 0.366) ***                                                                                 |
| <b>Hit/Miss</b>                             |                                                                           |                                                                                                          |
| Number of instances                         | -0.244 (-0.346, -0.051)                                                   | 0.470 (0.114, 0.825) *                                                                                   |
| Size                                        | 1.269 (1.146, 1.391) ***                                                  | -0.944 (-1.104, -0.785) ***                                                                              |
| Elongation                                  | -0.849 (-1.053, -0.646) ***                                               | 1.110 (0.865, 1.354) ***                                                                                 |
| Irrectangularity                            | -0.519 (-0.624, -0.415) ***                                               | 0.689 (0.564, 0.815) ***                                                                                 |

\* p-value < 0.05, \*\* p-value < 0.01, \*\*\* p-value < 0.001

322  
 323 **Effect of model confidence on localization performance**

324 We also conducted statistical analyses to determine whether there was any correlation  
 325 between the model’s confidence in its prediction and saliency method pipeline  
 326 performance (Table 3). We first ran a simple regression for each pathology using the  
 327 model’s probability output as the single independent variable and using the saliency  
 328 method IoU as the dependent variable. We then performed a simple regression that uses  
 329 the same approach as above, but that includes all 10 pathologies. For each of the 11  
 330 regressions, we used the full dataset since the analysis of false positives and false  
 331 negatives was also of interest. In addition to the linear regression coefficients, we also

332 computed the Spearman correlation coefficients to capture any potential non-linear  
333 associations.

334

335 We found that for all pathologies, model confidence was positively correlated with mIoU  
336 saliency method pipeline performance. The p-values for all coefficients were below 0.001  
337 except for the coefficients for Pneumothorax (n=11) and Lung Lesion (n=50), the two  
338 pathologies for which we had the fewest positive examples. Of all the pathologies, model  
339 confidence for positive predictions of Enlarged Cardiomeastinum had the largest linear  
340 regression coefficient with mIoU saliency method pipeline performance (1.974, p-  
341 value<0.001). Model confidence for positive predictions of Pneumothorax had the largest  
342 Spearman correlation coefficient with mIoU saliency method pipeline performance (0.734,  
343 p-value<0.01), followed by Pleural Effusion (0.690, p-value<0.001). Combining all  
344 pathologies (n=2365), the linear regression coefficient was 0.109 (95% CI [0.083, 0.135]),  
345 and the Spearman correlation coefficient was 0.285 (95% CI [0.239, 0.331]). We also  
346 performed analogous experiments using hit rate as the dependent variable and found  
347 comparable results (Extended Data Fig. 9).

**Table 3 | mIoU: Coefficients from regressions on model assurance**

| Pathology                | CXRs (n) | Linear regression coefficient | Spearman correlation coefficient |
|--------------------------|----------|-------------------------------|----------------------------------|
| Airspace Opacity         | 381      | 0.714 (0.601, 0.826) ***      | 0.577 (0.542, 0.610) ***         |
| Atelectasis              | 296      | 0.489 (0.333, 0.645) ***      | 0.348 (0.303, 0.391) ***         |
| Cardiomegaly             | 229      | 0.679 (0.535, 0.823) ***      | 0.592 (0.559, 0.624) ***         |
| Consolidation            | 120      | 1.155 (0.674, 1.635) ***      | 0.384 (0.341, 0.426) ***         |
| Edema                    | 124      | 0.642 (0.459, 0.826) ***      | 0.548 (0.512, 0.582) ***         |
| Enlarged Cardiomeastinum | 668      | 1.974 (1.608, 2.340) ***      | 0.428 (0.386, 0.468) ***         |
| Lung Lesion              | 50       | 0.218 (0.087, 0.349) **       | 0.509 (0.470, 0.545) ***         |
| Pleural Effusion         | 159      | 0.632 (0.489, 0.776) ***      | 0.690 (0.663, 0.715) ***         |
| Pneumothorax             | 11       | 0.446 (0.108, 0.783) *        | 0.734 (0.710, 0.756) **          |
| Support Devices          | 327      | 0.211 (0.172, 0.250) ***      | 0.468 (0.428, 0.506) ***         |
| All pathologies          | 2365     | 0.109 (0.083, 0.135) ***      | 0.285 (0.239, 0.331) ***         |

\* p-value < 0.05, \*\* p-value < 0.01, \*\*\* p-value < 0.001

348

## 349 Discussion

350 The purpose of this work was to evaluate the performance of some of the most used  
351 saliency methods for deep learning explainability using a variety of model architectures.  
352 We establish the first human benchmark for CXR segmentation in a multilabel  
353 classification setup and demonstrate that saliency maps are consistently worse than  
354 expert radiologists regardless of model classification AUROC. We use qualitative and  
355 quantitative analyses to establish that saliency method localization performance is most  
356 inferior to expert localization performance when a pathology has multiple instances, is  
357 smaller in size, or has shapes that are more complex, suggesting that deep learning  
358 explainability as a clinical interface may be less reliable and less useful when used for  
359 pathologies with those characteristics. We also show that model assurance is positively  
360 correlated with saliency method localization performance, which could indicate that

361 saliency methods are safer to use as a decision aid to clinicians when the model has  
362 made a positive prediction with high confidence.

363  
364 Because ground-truth segmentations for medical imaging are time-consuming and  
365 expensive to obtain, the current norm in medical imaging—both in research and in  
366 industry—is to use classification models on which saliency methods are applied post-hoc  
367 for localization, highlighting the need for investigations into the reliability of these methods  
368 in clinical settings<sup>46,47</sup>. There are public CXR datasets containing image-level labels  
369 annotated by expert radiologists (e.g., the CheXpert validation set), multilabel bounding  
370 box annotations (e.g., ChestX-ray8<sup>48</sup> and VinDr-CXR<sup>49</sup>), and segmentations for a single  
371 pathology (e.g., SIIM-ACR Pneumothorax Segmentation<sup>50</sup>). To our knowledge, however,  
372 there are no other publicly available CXR datasets with multilabel pixel-level expert  
373 segmentations. By publicly releasing a development dataset, CheXlocalize, of 234  
374 images with 885 expert segmentations, and a competition with a test set of 668 images,  
375 we hope to encourage the further development of saliency methods and other  
376 explainability techniques for medical imaging.

377  
378 Our work has several potential implications for human-AI collaboration in the context of  
379 medical decision-making. Heat maps generated using saliency methods are advocated  
380 as clinical decision support in the hope that they not only improve clinical decision-  
381 making, but also encourage clinicians to trust model predictions<sup>51-53</sup>. Many of the large  
382 CXR vendors<sup>54-56</sup> use localization methods to provide pathology visualization in their  
383 computer-aided detection (CAD) products. In addition to being used for clinical

384 interpretation, saliency method heat maps are also used for the evaluation of CXR  
385 interpretation models, for quality improvement (QI) and quality assurance (QA) in clinical  
386 practices, and for dataset annotation<sup>57</sup>. Explainable AI is critical in high-stakes contexts  
387 such as health care, and saliency methods have been used successfully to develop and  
388 understand models generally. Indeed, we found that the saliency method pipeline  
389 significantly outperformed the human benchmark on two pathologies when using mIoU  
390 as an evaluation metric. However, our work also suggests that saliency methods are not  
391 yet reliable enough to validate individual clinical decisions made by a model. We found  
392 that saliency method localization performance, on balance, performed worse than expert  
393 localization across multiple analyses and across many important pathologies (our findings  
394 are consistent with recent work focused on localizing a single pathology, Pneumothorax,  
395 in CXRs<sup>58</sup>). We hypothesize that this could be an algorithmic artifact of saliency methods,  
396 whose relatively small heat maps (14x14 for Grad-CAM) are interpolated to the original  
397 image dimensions (usually 2000x2000), resulting in coarse resolutions. If used in clinical  
398 practice, heat maps that incorrectly highlight medical images may exacerbate well  
399 documented biases (chiefly, automation bias) and erode trust in model predictions (even  
400 when model output is correct), limiting clinical translation<sup>22</sup>.

401  
402 Since IoU computes the overlap of two segmentations but pointing game hit rate better  
403 captures diagnostic attention, we suggest using both metrics when evaluating localization  
404 performance in the context of medical imaging. While IoU is a commonly used metric for  
405 evaluating semantic segmentation outputs, there are inherent limitations to the metric in  
406 the pathological context. This is indicated by our finding that even the human benchmark

407 segmentations had low overlap with the ground truth segmentations (the highest expert  
408 mIoU was 0.720 for Cardiomegaly). One potential explanation for this consistent  
409 underperformance is that pathologies can be hard to distinguish, especially without  
410 clinical context. Furthermore, whereas many people might agree on how to segment, say,  
411 a cat or a stop sign in traditional computer vision tasks, radiologists use a certain amount  
412 of clinical discretion when defining the boundaries of a pathology on a CXR. There can  
413 also be institutional and geographic differences in how radiologists are taught to  
414 recognize pathologies, and studies have shown that there can be high interobserver  
415 variability in the interpretation of CXRs<sup>59–61</sup>. We sought to address this with the hit rate  
416 evaluation metric, which highlights when two radiologists share the same diagnostic  
417 intention, even if it is less exact than IoU in comparing segmentations directly. The human  
418 benchmark localization using hit rate was above 0.9 for four pathologies (Pneumothorax,  
419 Cardiomegaly, Support Devices, and Enlarged Cardiomedastinum); these are  
420 pathologies for which there is often little disagreement between radiologists about where  
421 the pathologies are located, even if the expert segmentations are noisy. Further work is  
422 needed to demonstrate which segmentation evaluation metrics, even beyond overlap and  
423 hit rate, are more appropriate for certain pathologies and downstream tasks when  
424 evaluating saliency methods for the clinical setting.

425  
426 Our work builds upon several studies investigating the validity of saliency maps for  
427 localization<sup>62,63,64</sup> and upon some early work on the trustworthiness of saliency methods  
428 to explain DNNs in medical imaging<sup>47</sup>. However, as recent work has shown<sup>32</sup>, evaluating  
429 saliency methods is inherently difficult given that they are post-hoc techniques. To

430 illustrate this, consider the following models and saliency methods as described by some  
431 oracle: (1) a model  $M_{bad}$  that has perfect AUROC for a given image classification task,  
432 but that we know does *not* localize well (i.e. because the model picks up on confounders  
433 in the image); (2) a model  $M_{good}$  that also has perfect AUROC, but that we know *does*  
434 localize well (i.e. is looking at relevant regions of the image); (3) a saliency method  $S_{bad}$   
435 that does *not* properly reflect the model's attention; and (4) a saliency method  $S_{good}$   
436 that *does* properly reflect the model's attention. Let us say that we are evaluating the  
437 following pipeline: we first classify an image and we then apply a saliency method post  
438 hoc. Imagine that our evaluation reveals poor localization performance as measured by  
439 mIoU or hit rate (as was the case in our findings). There are three possible pipelines  
440 (combinations of model and saliency method) that would lead to this scenario: (1)  $M_{bad}$   
441 +  $S_{good}$ ; (2)  $M_{good}$  +  $S_{bad}$ ; and (3)  $M_{bad}$  +  $S_{bad}$ . The first scenario ( $M_{bad}$  +  
442  $S_{good}$ ) is the one for which saliency methods were originally intended: we have a  
443 working saliency method that properly alerts us to models picking up on confounders. The  
444 second scenario ( $M_{good}$  +  $S_{bad}$ ) is our nightmare scenario: we have a working model  
445 whose attention is appropriately directed, but we reject it based on a poorly localizing  
446 saliency method. Because all three scenarios result in poor localization performance, it is  
447 difficult—if not impossible—to know whether poor localization performance is attributable  
448 to the model or to the saliency method (or to both). While we cannot say whether models  
449 or saliency methods are failing in the context of medical imaging, we can say that we  
450 should not rely on saliency methods to evaluate model localization. Future work should  
451 explore potential techniques for localization performance attribution.

452

453 There are several limitations of our work. First, we did not investigate the impact of  
454 pathology prevalence in the training data on saliency method localization performance.  
455 Second, some pathologies, such as effusions and cardiomegaly, are in similar locations  
456 across frontal view CXRs, while others, such as lesions and opacities, can vary in  
457 locations across CXRs. Future work could investigate how the location of pathologies on  
458 a CXR in the training/test data distribution, and the consistency of those locations, affect  
459 saliency method localization performance. Third, while we compared saliency method-  
460 generated pixel-level segmentations to human expert pixel-level segmentations, future  
461 work might explore how saliency method localization performance changes when  
462 comparing bounding-box annotations, instead of pixel-level segmentations. Fourth, we  
463 explored post-hoc interpretability methods given their prevalence in the context of medical  
464 imaging, but we hope that by publicly releasing our development dataset of pixel-level  
465 expert segmentations we can facilitate the development of models that make use of  
466 ground-truth segmentations during training<sup>57</sup>. Fifth, the lack of a given finding can in  
467 certain cases inform clinical diagnoses. A common example of this is the lack of normal  
468 lung tissue pattern towards the edges of the thoracic cage, which is used to detect  
469 pneumothorax. For any characteristic pattern, both the absence and the presence provide  
470 diagnostic information to the radiologist. For example, the absence of a pleural effusion  
471 pattern is also used to rule out pleural effusion. For any characteristic radiological pattern,  
472 both the presence as well as the absence contributes to the final radiology report. Future  
473 work can explore counterfactual visual explanations that are similar to the counterfactual  
474 diagnostic process of a radiologist. Sixth, future work should further explore the potentially  
475 confounding effect of model calibration on the evaluation of saliency methods, especially



476 when using segmentation, as opposed to classification, models. Finally, the impact of  
477 saliency methods on the trust and efficacy of users is underexplored.

478  
479 In conclusion, we present a rigorous evaluation of a range of saliency methods and a  
480 human benchmark dataset, which can serve as a foundation for future work exploring  
481 deep learning explainability techniques. This work is a reminder that care should be taken  
482 when leveraging common saliency methods to validate individual clinical decisions in  
483 deep learning-based workflows for medical imaging.

484  
485 **Methods**

486 **Ethical and information governance approvals.**

487 A formal Stanford IRB review was conducted for the original collection of the CheXpert  
488 dataset. The IRB waived the requirement to obtain informed consent as the data were  
489 retrospectively collected and fully anonymized.

490  
491 **Dataset and clinical taxonomy.** *Dataset description.* The localization experiments were  
492 performed using CheXpert, a large public dataset for chest X-ray interpretation. The  
493 CheXpert dataset contains 224,316 chest X-rays for 65,240 patients labeled for the  
494 presence of 14 observations (13 pathologies and an observation of “No Finding”) as  
495 positive, negative, or uncertain. The CheXpert validation set consists of 234 chest X-rays  
496 from 200 patients randomly sampled from the full dataset and was labeled according to  
497 the consensus of three board-certified radiologists. The test set consists of 668 chest X-  
498 rays from 500 patients not included in the training or validation sets and was labeled

499 according to the consensus of five board-certified radiologists. See Extended Data Fig.  
500 10 for test set summary statistics.

501  
502 *Ground-truth segmentation.* The chest X-rays in our validation set and test set were  
503 manually segmented by two board-certified radiologists with 18 and 27 years of  
504 experience, using the annotation software tool MD.ai<sup>65</sup> (see Supplementary Figs. S12  
505 through S14). The radiologists were asked to contour the region of interest for all  
506 observations in the chest X-rays for which there was a positive ground truth label in the  
507 CheXpert dataset. For a pathology with multiple instances, all the instances were  
508 contoured. For Support Devices, radiologists were asked to contour any implanted or  
509 invasive devices including pacemakers, PICC/central catheters, chest tubes,  
510 endotracheal tubes, feeding tubes and stents and ignore ECG lead wires or external  
511 stickers visible in the chest X-ray.

512  
513 *Evaluating the expert performance using benchmark segmentation.* To evaluate the  
514 expert performance on the test set using the IoU evaluation method, three radiologists,  
515 certified in Vietnam with 9, 10, and 18 years of experience, were asked to segment the  
516 regions of interest for all observations in the chest X-rays for which there was a positive  
517 ground truth label in the CheXpert dataset. These radiologists were also provided the  
518 same instructions for contouring as were provided to the radiologists drawing the  
519 reference segmentations. To extract the “maximally activated” point from the benchmark  
520 segmentations, we asked the same radiologists to locate each pathology present on each  
521 CXR using only a single most representative point for that pathology on the CXR (see

522 Supplementary Figs. S1 through S11 for the detailed instructions given to the  
523 radiologists). There was no overlap between these three radiologists and the two who  
524 drew the reference segmentations.

525

526 **Classification network architecture and training protocol.** *Multi-label classification*

527 *model.* The model takes as input a single-view chest X-ray and outputs the probability for  
528 each of the 14 observations. In case of availability of more than one view, the models  
529 output the maximum probability of the observations across the views. Each chest X-ray  
530 was resized to 320×320 pixels and normalized before it was fed into the network. We  
531 used the same image resolutions as CheXpert<sup>36</sup> and CheXnet<sup>2</sup>, which demonstrated  
532 radiologist-level performance on external test sets with 320x320 images. There are  
533 models that are commercially deployed and have similar dimensions. For example, the  
534 architecture used by a medical AI software vendor Annalise.ai<sup>66</sup> is based on  
535 EfficientNet<sup>67</sup>, which takes input of 224x224. Chest X-rays were normalized prior to being  
536 fed into the network by subtracting the mean of all images in the CheXpert training set  
537 and then dividing by the standard deviation of all images in the CheXpert training set. The  
538 model architectures (DenseNet121, ResNet152, and Inception-v4) were used. Cross-  
539 entropy loss was used to train the model. The Adam optimizer<sup>68</sup> was used with default  $\beta$ -  
540 parameters of  $\beta_1 = 0.9$  and  $\beta_2 = 0.999$ . The learning rate was hyperparameter tuned for  
541 the different model architectures. Grid search was used to tune the learning rates. We  
542 searched over learning rates of 1e-3, 1e-4, and 1e-5. The best learning rate for each  
543 architecture was:  $1 \times 10^{-4}$  for DenseNet121,  $1 \times 10^{-5}$  for ResNet152,  $1 \times 10^{-5}$  for  
544 Inceptionv4. Batches were sampled using a fixed batch size of 16 images.

545  
546 *Ensembling.* We use an ensemble of checkpoints to create both predictions and saliency  
547 maps to maximize model performance. In order to capture uncertainties inherent in  
548 radiograph interpretation, we train our models using four uncertainty handling strategies  
549 outlined in CheXpert: Ignoring, Zeroes, Ones, and 3-Class Classification. For each of the  
550 four uncertainty handling strategies, we train our model three separate times, each time  
551 saving the 10 checkpoints across the three epochs with the highest average AUC across  
552 5 observations selected for their clinical importance and prevalence in the validation set:  
553 Atelectasis, Cardiomegaly, Consolidation, Edema, and Pleural Effusion. In total, after  
554 training, we have saved  $4 \times 30 = 120$  checkpoints for a given model. Then, from the 120  
555 saved checkpoints for that model, we select the top 10 performing checkpoints for each  
556 pathology. For each CXR and each task, we compute the predictions and saliency maps  
557 using the relevant checkpoints. We then take the mean both of the predictions and of the  
558 saliency maps to create the final set of predictions and saliency maps for the ensemble  
559 model. See Supplementary Table S1 for the performance of each model architecture  
560 (DenseNet121, ResNet152, and Inception-v4) on each of the pathologies.

561  
562 **CNN interpretation strategy.** Saliency methods were used to visualize the decision  
563 made by the classification network. The saliency map was resized to the original image  
564 dimension using bilinear interpolation. It was then normalized using max-min  
565 normalization and then converted into a binary segmentation using binary thresholding  
566 (Otsu's method). We also reported mIoU localization performance using different saliency  
567 map thresholding values. We first applied max-min normalizations to the saliency maps

568 so that each value gets transformed into a decimal between 0 and 1. We then passed in  
569 a range of threshold values from 0.2 to 0.8 to create binary segmentations and calculated  
570 the mIoU score per pathology under each threshold on the validation set. Then for the  
571 analysis on the full dataset (see Extended Data Fig. 4), we further ensure that the final  
572 binary segmentation is consistent with model probability output by applying another layer  
573 of thresholding such that the segmentation mask produced all zeros if the predicted  
574 probability was below a chosen level. The probability threshold is searched on the interval  
575 of [0,0.8] with steps of 0.1. The exact value is determined per pathology by maximizing  
576 the mIoU on validation set.

577

578 For Occlusion, we used a window size of 40 and a stride of 40 for each CXR.

579

580 *Segmentation evaluation metrics.* Localization performance of each segmentation was  
581 evaluated using Intersection over Union (IoU) score. The IoU is the ratio between the  
582 area of overlap and the area of union between the ground truth and the predicted areas,  
583 ranging from 0 to 1 with 0 signifying no overlap and 1 signifying perfectly overlapping  
584 segmentation. Confidence intervals are calculated using bootstrapping with 1000  
585 bootstrap samples. The variance in the width of CI across pathologies can be explained  
586 by difference in sample sizes. For the percentage decrease from expert mIoU to AI mIoU,  
587 we bootstrapped the difference between human benchmark and saliency method  
588 localization and created the 95% confidence intervals. The confidence intervals for hit  
589 rates were calculated in the same fashion. For the evaluation of Integrated Gradients  
590 using IoU, we applied box filtering of kernel size 100 to smooth the pixelated map. For

591 DeepLIFT, we applied box filtering of kernel size 50. For LRP, we used a kernel size of  
592 80. The kernel sizes are tuned on the validation set. The noisy map is not a concern for  
593 hit rate because a single max pixel is extracted for the entire image.

594

### 595 **Statistical analysis.**

596 *Pathology Characteristics.* We used four features to characterize the pathologies. (1)  
597 Number of instances is defined as the number of disjoint components in the  
598 segmentation. (2) Size is the area of the pathology divided by the total image area. (3)  
599 and (4) Elongation and irrectangularity are geometric features that measure shape  
600 complexities. They were designed to quantify what radiologists qualitatively described as  
601 focal or diffused. To calculate the metrics, a rectangle of minimum area enclosing the  
602 contour is fitted to each pathology. Elongation is defined as the ratio of the rectangle's  
603 longer side to short side. Irrectangularity =  $1 - (\text{area of segmentation}/\text{area of enclosing}$   
604  $\text{rectangle})$ , with values ranging from 0 to 1 with 1 being very irrectangular. When there  
605 are multiple instances within one pathology, we used the characteristics of the dominant  
606 instance (largest in perimeter).

607

608 *Model Confidence.* We used the probability output of the DNN architecture for model  
609 confidence. The probabilities were normalized using max-min normalization per  
610 pathology before aggregation.

611

612 *Linear Regression.* For each evaluation scheme (overlap and hit rate), we ran two groups  
613 of simple linear regressions, with AI evaluation metrics and their differences as the

614 response variables. Each group has four regressions using the above four pathological  
615 characteristics as the regressions' single attribute, respectively, and only the true positive  
616 slice was included in each regression. All features are normalized using min-max  
617 normalization so that they are comparable on scales of magnitudes. We report the 95%  
618 confidence interval and Bonferroni adjusted p-value of the regression coefficients.

619

## 620 **Data Availability**

621 The CheXlocalize dataset is available here:

622 <https://stanfordaimi.azurewebsites.net/datasets/abfb76e5-70d5-4315-badc->

623 [c94dd82e3d6d](https://stanfordaimi.azurewebsites.net/datasets/abfb76e5-70d5-4315-badc-c94dd82e3d6d). The CheXpert dataset is available here

624 <https://stanfordmlgroup.github.io/competitions/chexpert/>.

625

## 626 **Code Availability**

627 The code used to generate segmentations from saliency method heat maps, fine-tune  
628 segmentation thresholds, generate segmentations from human annotations, and evaluate  
629 localization performance is available in the following public repository under the MIT  
630 License: <https://github.com/rajpurkarlab/cheXlocalize>. The version used for this  
631 publication is available at <https://doi.org/10.5281/zenodo.6816288><sup>69</sup>.

632

## 633 **Acknowledgements**

634 We would like to acknowledge MD.ai for generously providing us access to their  
635 annotation platform. We would like to acknowledge Weights & Biases for generously  
636 providing us access to their experiment tracking tools.

637

## 638 **Author Contributions**

639 Conceptualization: P.R. and A.P. Design: P.R., A.P., A.S., X.G. and A.A. Data analysis  
640 and interpretation: A.S., X.G., A.A., P.R., A.P., S.T., C.N., V.N., J.S., and F.B. Drafting of  
641 the manuscript: A.S., X.G., A.A., and P.R. Critical revision of the manuscript for important  
642 intellectual content: A.P, S.T., C.N., V.N., J.S., F.B, A.N., and M.L. Supervision: A.N.,  
643 M.L., and P.R. Research was primarily performed while A.S. was at Stanford University.  
644 M.L. and P.R. contributed equally.

645

## 646 **Competing Interests**

647 M.L. is an advisor for and/or has research funded by GE, Philips, Carestream, Nines  
648 Radiology, Segmed, Centaur Labs, Microsoft, BunkerHill, and Amazon Web Services  
649 (none of the funded research was relevant to this project). A.P. is a medical associate at  
650 Cerebriu. The remaining authors declare no competing interests.

651

## 652 **References**

- 653 1. Rajpurkar, P. *et al.* Deep learning for chest radiograph diagnosis: A retrospective  
654 comparison of the CheXNeXt algorithm to practicing radiologists. *PLOS Med.* **15**,  
655 e1002686 (2018).
- 656 2. Rajpurkar, P. *et al.* CheXNet: Radiologist-Level Pneumonia Detection on Chest X-  
657 Rays with Deep Learning. *ArXiv171105225 Cs Stat* (2017).



- 658 3. Bien, N. *et al.* Deep-learning-assisted diagnosis for knee magnetic resonance  
659 imaging: Development and retrospective validation of MRNet. *PLOS Med.* **15**,  
660 e1002699 (2018).
- 661 4. Baselli, G., Codari, M. & Sardanelli, F. Opening the black box of machine learning in  
662 radiology: can the proximity of annotated cases be a way? *Eur. Radiol. Exp.* **4**, 30  
663 (2020).
- 664 5. Litjens, G. *et al.* A survey on deep learning in medical image analysis. *Med. Image*  
665 *Anal.* **42**, 60–88 (2017).
- 666 6. Wang, F., Kaushal, R. & Khullar, D. Should Health Care Demand Interpretable  
667 Artificial Intelligence or Accept “Black Box” Medicine? *Ann. Intern. Med.* **172**, 59–60  
668 (2019).
- 669 7. Goodman, B. & Flaxman, S. European Union regulations on algorithmic decision-  
670 making and a ‘right to explanation’. *AI Mag.* **38**, 50–57 (2017).
- 671 8. Venugopal, V. K., Takhar, R., Gupta, S., Saboo, A. & Mahajan, V. *Clinical*  
672 *Explainability Failure (CEF) & Explainability Failure Ratio (EFR) – changing the way*  
673 *we validate classification algorithms?* *J Med Syst* **46**, 20 (2022).
- 674 9. Pasa, F., Golkov, V., Pfeiffer, F., Cremers, D. & Pfeiffer, D. Efficient Deep Network  
675 Architectures for Fast Chest X-Ray Tuberculosis Screening and Visualization. *Sci.*  
676 *Rep.* **9**, 6268 (2019).
- 677 10. Simonyan, K., Vedaldi, A. & Zisserman, A. Deep Inside Convolutional Networks:  
678 Visualising Image Classification Models and Saliency Maps. *ArXiv13126034 Cs*  
679 (2014).

- 680 11. Aggarwal, M. *et al.* Towards Trainable Saliency Maps in Medical Imaging.  
681 *ArXiv201107482 Cs Eess* (2020).
- 682 12. Tjoa, E. & Guan, C. Quantifying Explainability of Saliency Methods in Deep  
683 Neural Networks. *ArXiv200902899 Cs* (2020).
- 684 13. Badgeley, M. A. *et al.* Deep learning predicts hip fracture using confounding  
685 patient and healthcare variables. *Npj Digit. Med.* **2**, 31 (2019).
- 686 14. Zech, J. R. *et al.* Variable generalization performance of a deep learning model  
687 to detect pneumonia in chest radiographs: A cross-sectional study. *PLOS Med.* **15**,  
688 e1002683 (2018).
- 689 15. DeGrave, A. J., Janizek, J. D. & Lee, S.-I. AI for radiographic COVID-19  
690 detection selects shortcuts over signal. *Nat Mach Intell* **3**, 610-619 (2021).
- 691 16. Makimoto, H. *et al.* Performance of a convolutional neural network derived from  
692 an ECG database in recognizing myocardial infarction. *Sci. Rep.* **10**, 8445 (2020).
- 693 17. Porumb, M., Stranges, S., Pescapè, A. & Pecchia, L. Precision Medicine and  
694 Artificial Intelligence: A Pilot Study on Deep Learning for Hypoglycemic Events  
695 Detection based on ECG. *Sci. Rep.* **10**, 1–16 (2020).
- 696 18. Tham, Y.-C. *et al.* Referral for disease-related visual impairment using retinal  
697 photograph-based deep learning: a proof-of-concept, model development study.  
698 *Lancet Digit. Health* **3**, e29–e40 (2021).
- 699 19. Varadarajan, A. V. *et al.* Deep Learning for Predicting Refractive Error From  
700 Retinal Fundus Images. *Invest. Ophthalmol. Vis. Sci.* **59**, 2861–2868 (2018).
- 701 20. Mitani, A. *et al.* Detection of anaemia from retinal fundus images via deep  
702 learning. *Nat. Biomed. Eng.* **4**, 18–27 (2020).

- 703 21. Deep Learning to Assess Long-term Mortality From Chest Radiographs |  
704 Pulmonary Medicine | JAMA Network Open | JAMA Network. [https://jamanetwork-](https://jamanetwork-com.stanford.idm.oclc.org/journals/jamanetworkopen/fullarticle/2738349)  
705 [com.stanford.idm.oclc.org/journals/jamanetworkopen/fullarticle/2738349](https://jamanetwork-com.stanford.idm.oclc.org/journals/jamanetworkopen/fullarticle/2738349).
- 706 22. Rajpurkar, P. *et al.* CheXaid: deep learning assistance for physician diagnosis of  
707 tuberculosis using chest x-rays in patients with HIV. *Npj Digit. Med.* **3**, 1–8 (2020).
- 708 23. Rajpurkar, P. *et al.* AppendiXNet: Deep Learning for Diagnosis of Appendicitis  
709 from A Small Dataset of CT Exams Using Video Pretraining. *Sci. Rep.* **10**, 3958  
710 (2020).
- 711 24. Huang, S.-C. *et al.* PENet—a scalable deep-learning model for automated  
712 diagnosis of pulmonary embolism using volumetric CT imaging. *Npj Digit. Med.* **3**, 1–  
713 9 (2020).
- 714 25. Rudin, C. Stop explaining black box machine learning models for high stakes  
715 decisions and use interpretable models instead. *Nat. Mach. Intell.* **1**, 206–215 (2019).
- 716 26. Eitel, F. & Ritter, K. Testing the Robustness of Attribution Methods for  
717 Convolutional Neural Networks in MRI-Based Alzheimer’s Disease Classification.  
718 *Interpretability of Machine Intelligence in Medical Image Computing and Multimodal*  
719 *Learning for Clinical Decision Support* (eds. Suzuki, K. *et al.*) 3-11 (Springer  
720 International Publishing, 2019). doi:10.1007/978-3-030-33850-3\_1.
- 721 27. Young, K., Booth, G., Simpson, B., Dutton, R. & Shrapnel, S. Deep Neural  
722 Network or Dermatologist? in *Interpretability of Machine Intelligence in Medical Image*  
723 *Computing and Multimodal Learning for Clinical Decision Support* (eds. Suzuki, K. *et*  
724 *al.*) 48–55 (Springer International Publishing, 2019). doi:10.1007/978-3-030-33850-  
725 3\_6.

- 726 28. Ghassemi, M., Oakden-Rayner, L. & Beam, A. L. The false hope of current  
727 approaches to explainable artificial intelligence in health care. *Lancet Digit. Health* 3,  
728 e745–e750 (2021).
- 729 29. Reyes, M. *et al.* On the Interpretability of Artificial Intelligence in Radiology:  
730 Challenges and Opportunities. *Radiol. Artif. Intell.* **2**, e190043 (2020).
- 731 30. Selvaraju, R. R. *et al.* Grad-CAM: Visual Explanations from Deep Networks via  
732 Gradient-based Localization. *Int. J. Comput. Vis.* **128**, 336–359 (2020).
- 733 31. Chattopadhyay, A., Sarkar, A., Howlader, P. & Balasubramanian, V. N. Grad-  
734 CAM++: Generalized Gradient-Based Visual Explanations for Deep Convolutional  
735 Networks. in *2018 IEEE Winter Conference on Applications of Computer Vision*  
736 (WACV) 839–847 (2018). doi:10.1109/WACV.2018.00097.
- 737 32. Sundararajan, M., Taly, A. & Yan, Q. Axiomatic attribution for deep networks. in  
738 *Proceedings of the 34th International Conference on Machine Learning - Volume 70*  
739 3319–3328 (JMLR.org, 2017).
- 740 33. Huang, G., Liu, Z., Van Der Maaten, L. & Weinberger, K. Q. Densely Connected  
741 Convolutional Networks. in *2017 IEEE Conference on Computer Vision and Pattern*  
742 *Recognition (CVPR)* 2261–2269 (IEEE, 2017). doi:10.1109/CVPR.2017.243.
- 743 34. He, K., Zhang, X., Ren, S. & Sun, J. Deep Residual Learning for Image  
744 Recognition. in *2016 IEEE Conference on Computer Vision and Pattern Recognition*  
745 (CVPR) 770–778 (IEEE, 2016). doi:10.1109/CVPR.2016.90.
- 746 35. Szegedy, C. *et al.* Going deeper with convolutions. in *2015 IEEE Conference on*  
747 *Computer Vision and Pattern Recognition (CVPR)* 1–9 (2015).  
748 doi:10.1109/CVPR.2015.7298594.

- 749 36. Irvin, J. *et al.* CheXpert: A Large Chest Radiograph Dataset with Uncertainty  
750 Labels and Expert Comparison. *Proc. AAAI Conf. Artif. Intell.* **33**, 590–597 (2019).
- 751 37. Otsu, N. A Threshold Selection Method from Gray-Level Histograms. *IEEE Trans*  
752 *Syst. Man Cybern.* 62–66 (1979).
- 753 38. Zhang, J. *et al.* Top-down Neural Attention by Excitation Backprop. *Int. J.*  
754 *Comput. Vis.* **126**, 1084-1102 (2018).
- 755 39. Kim, H.-E. *et al.* Changes in cancer detection and false-positive recall in  
756 mammography using artificial intelligence: a retrospective, multireader study. *Lancet*  
757 *Digit. Health* **2**, e138–e148 (2020).
- 758 40. Efron, B. & Tibshirani, R. J. *An Introduction to the Bootstrap*. (CRC Press, 1994).
- 759 41. Bany Muhammad, M. *et al.* Eigen-CAM: Visual Explanations for Deep  
760 Convolutional Neural Networks. *SN COMPUT. SCI.* **2**, 47 (2021).
- 761 42. Shrikumar, A., Greenside, P. & Kundaje, A. Learning Important Features  
762 Through Propagating Activation Differences. In *International conference on machine*  
763 *learning* 3145-3153 (PMLR, 2017).
- 764 43. Bach, S. *et al.* On Pixel-Wise Explanations for Non-Linear Classifier Decisions by  
765 Layer-Wise Relevance Propagation. *PLOS ONE* **10**, e0130140 (2015).
- 766 44. Zeiler, M. D. & Fergus, R. Visualizing and Understanding Convolutional  
767 Networks. in *Computer Vision – ECCV 2014* (eds. Fleet, D., Pajdla, T., Schiele, B. &  
768 Tuytelaars, T.) 818–833 (Springer International Publishing, 2014). doi:10.1007/978-3-  
769 319-10590-1\_53.
- 770 45. Vrabac, D. *et al.* DLBCL-Morph: Morphological features computed using deep  
771 learning for an annotated digital DLBCL image set. *Sci Data* **8**, 135 (2021).

- 772 46. Ayhan, M. S. et al. Clinical validation of saliency maps for understanding deep  
773 neural networks in ophthalmology. *Med. Image Anal.* 77, 102364 (2022).
- 774 47. Arun, N. et al. Assessing the Trustworthiness of Saliency Maps for Localizing  
775 Abnormalities in Medical Imaging. *Radiol. Artif. Intell.* 3, e200267 (2021).
- 776 48. Wang, X. et al. ChestX-ray8: Hospital-Scale Chest X-Ray Database and  
777 Benchmarks on Weakly-Supervised Classification and Localization of Common  
778 Thorax Diseases. in *2017 IEEE Conference on Computer Vision and Pattern  
779 Recognition (CVPR) 2097–2106* (IEEE, 2017).
- 780 49. Nguyen, H. Q. et al. VinDr-CXR: An open dataset of chest X-rays with radiologist's  
781 annotations. (2022) doi:10.48550/arXiv.2012.15029.
- 782 50. SIIM-ACR Pneumothorax Segmentation. [https://kaggle.com/c/siim-acr-](https://kaggle.com/c/siim-acr-pneumothorax-segmentation)  
783 [pneumothorax-segmentation](https://kaggle.com/c/siim-acr-pneumothorax-segmentation).
- 784 51. Steiner, D. F. et al. Impact of Deep Learning Assistance on the Histopathologic  
785 Review of Lymph Nodes for Metastatic Breast Cancer. *Am. J. Surg. Pathol.* 42,  
786 1636–1646 (2018).
- 787 52. Uyumazturk, B. et al. Deep Learning for the Digital Pathologic Diagnosis of  
788 Cholangiocarcinoma and Hepatocellular Carcinoma: Evaluating the Impact of a Web-  
789 based Diagnostic Assistant. *ArXiv191107372 Eess* (2019).
- 790 53. Park, A. et al. Deep Learning–Assisted Diagnosis of Cerebral Aneurysms Using  
791 the HeadXNet Model. *JAMA Netw. Open* 2, e195600 (2019).
- 792 54. Annalise.ai - Medical imaging AI, by clinicians for clinicians. *Annalise.ai*  
793 <https://annalise.ai/>.
- 794 55. Lunit Inc. <https://www.lunit.io/en>.

- 795 56. Qure.ai | Artificial Intelligence for Radiology. <https://qure.ai/>.
- 796 57. Gadgil, S., Endo, M., Wen, E., Ng, A. Y. & Rajpurkar, P. CheXseg: Combining  
797 Expert Annotations with DNN-generated Saliency Maps for X-ray Segmentation. In  
798 *Proceedings of the Fourth Conference on Medical Imaging with Deep Learning* 190-  
799 204 (PMLR, 2021).
- 800 58. Crosby, J., Chen, S., Li, F., MacMahon, H. & Giger, M. Network output  
801 visualization to uncover limitations of deep learning detection of pneumothorax. in  
802 *Medical Imaging 2020: Image Perception, Observer Performance, and Technology*  
803 *Assessment* vol. 11316 113160O (International Society for Optics and Photonics,  
804 2020).
- 805 59. Melbye, H. & Dale, K. Interobserver Variability in the Radiographic Diagnosis of  
806 Adult Outpatient Pneumonia. *Acta Radiol.* **33**, 79–81 (1992).
- 807 60. Herman, P. G. *et al.* Disagreements in Chest Roentgen Interpretation. *CHEST*  
808 **68**, 278–282 (1975).
- 809 61. Albaum, M. N. *et al.* Interobserver Reliability of the Chest Radiograph in  
810 Community-Acquired Pneumonia. *CHEST* **110**, 343–350 (1996).
- 811 62. Arun, N. T. *et al.* Assessing the validity of saliency maps for abnormality  
812 localization in medical imaging. In *Medical Imaging with Deep Learning*. (2020).
- 813 63. Graziani, M., Lompech, T., Müller, H. & Andrearczyk, V. *Evaluation and*  
814 *Comparison of CNN Visual Explanations for Histopathology*. (2020).
- 815 64. Choe, J. *et al.* Evaluating Weakly Supervised Object Localization Methods Right.  
816 In *Proceedings of the IEEE/CVF Conference on Computer Vision and Pattern*  
817 *Recognition* 3133-3142 (IEEE, 2020).

- 818 65. MD.ai. <https://www.md.ai/>.
- 819 66. Seah, J. C. Y. et al. Effect of a comprehensive deep-learning model on the  
820 accuracy of chest x-ray interpretation by radiologists: a retrospective, multireader  
821 multicase study. *Lancet Digit. Health* 3, e496–e506 (2021).
- 822 67. Tan, M. & Le, Q. V. EfficientNet: Rethinking Model Scaling for Convolutional  
823 Neural Networks. In *International conference on machine learning* 6105-6114 (PMLR,  
824 2020).
- 825 68 Kingma, D. P. & Ba, J. Adam: A Method for Stochastic Optimization.  
826 *ArXiv14126980 Cs* (2017).
- 827 69. Saporta, A. et al. Code for ‘Benchmarking saliency methods for chest X-ray  
828 interpretation’ (Zenodo, 2022); <https://doi.org/10.5281/zenodo.6816288>.
- 829



830 **Extended Data**  
831

a

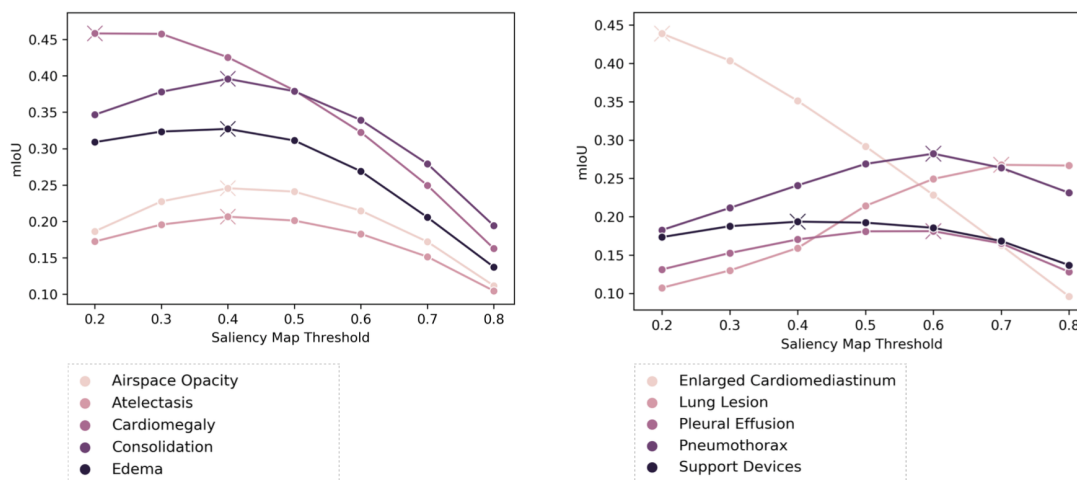

b

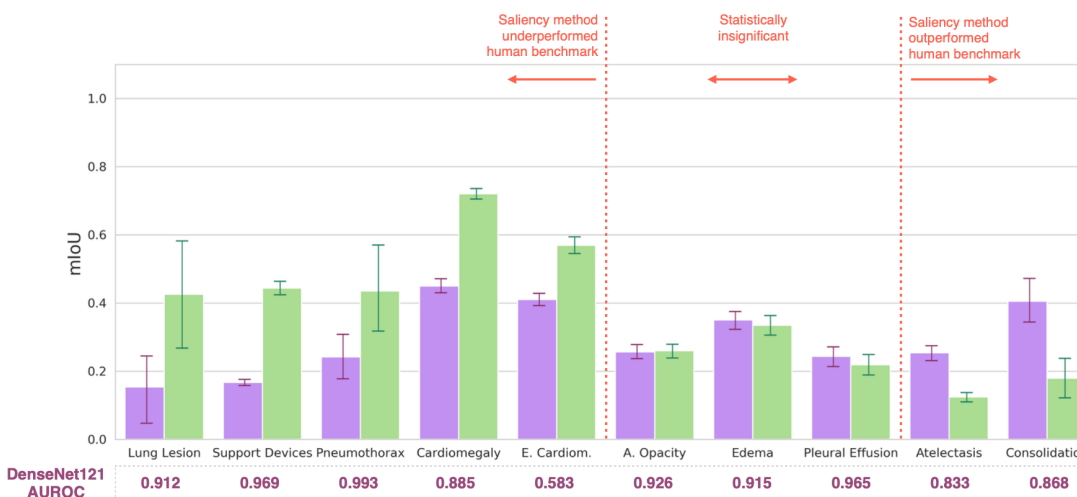

832 **Extended Data Fig. 1 | mIoU localization performance of the saliency method**  
 833 **pipeline using threshold values tuned on the validation set. a,** We first applied max-  
 834 min normalizations to the Grad-CAM saliency maps so that each value gets transformed  
 835 into a decimal between 0 and 1. We then passed in a range of threshold values from 0.2  
 836 to 0.8 to create binary segmentations and plotted the mIoU score per pathology under  
 837 each threshold on the validation set. The threshold that gives the max mIoU for each  
 838 pathology is marked with an “X”. Pathologies are sorted alphabetically and shown in two  
 839 plots for readability. **b,** Comparing mIoU localization performances of the saliency  
 840 method pipeline (using the best thresholds tuned on the validation set) and the human  
 841 benchmark. We found that the saliency method pipeline outperformed the human  
 842 benchmark on two pathologies and underperformed the human benchmark on five  
 843 pathologies. For the remaining three pathologies, the performance differences were not  
 844 statistically significant. This finding is consistent with what we report in the manuscript  
 845 using Otsu's method.  
 846

847

| pathology         | specificity<br>(precision)  |                    | sensitivity<br>(recall)     |                    |
|-------------------|-----------------------------|--------------------|-----------------------------|--------------------|
|                   | saliency method<br>pipeline | human<br>benchmark | saliency method<br>pipeline | human<br>benchmark |
| Airspace Opacity  | 0.844                       | <b>0.982</b>       | <b>0.975</b>                | 0.961              |
| Atelectasis       | 0.854                       | <b>0.999</b>       | <b>0.985</b>                | 0.971              |
| Cardiomegaly      | 0.914                       | <b>0.998</b>       | 0.978                       | <b>0.986</b>       |
| Consolidation     | 0.916                       | <b>1.000</b>       | <b>0.998</b>                | 0.995              |
| Edema             | 0.851                       | <b>0.997</b>       | <b>0.988</b>                | 0.980              |
| Enlarged Cardiom. | 0.935                       | <b>0.993</b>       | 0.938                       | <b>0.958</b>       |
| Lung Lesion       | 0.887                       | <b>1.000</b>       | <b>1.000</b>                | <b>1.000</b>       |
| Pleural Effusion  | 0.808                       | <b>0.999</b>       | <b>0.994</b>                | 0.987              |
| Pneumothorax      | 0.866                       | <b>1.000</b>       | <b>1.000</b>                | <b>1.000</b>       |
| Support Devices   | 0.862                       | <b>0.997</b>       | <b>0.980</b>                | 0.979              |

848  
849  
850  
851  
852

**Extended Data Fig. 2 | Specificity and sensitivity values of the saliency method pipeline and human benchmark.** For each pathology, we highlight the higher of the two metrics (saliency method pipeline or human benchmark) in **bold**.

| pathology         | Grad-CAM     |              |              | Grad-CAM++   |              |              | Integrated Gradients |              |              |
|-------------------|--------------|--------------|--------------|--------------|--------------|--------------|----------------------|--------------|--------------|
|                   | DenseNet121  | ResNet152    | Inception-v4 | DenseNet121  | ResNet152    | Inception-v4 | DenseNet121          | ResNet152    | Inception-v4 |
| mIoU              |              |              |              |              |              |              |                      |              |              |
| Airspace Opacity  | <b>0.248</b> | 0.194        | 0.090        | <b>0.234</b> | 0.198        | 0.115        | <b>0.123</b>         | 0.119        | 0.052        |
| Atelectasis       | <b>0.254</b> | 0.221        | 0.115        | <b>0.245</b> | 0.210        | 0.106        | <b>0.116</b>         | 0.115        | 0.064        |
| Cardiomegaly      | <b>0.452</b> | 0.424        | 0.120        | <b>0.346</b> | 0.257        | 0.196        | <b>0.160</b>         | 0.154        | 0.089        |
| Consolidation     | <b>0.408</b> | 0.334        | 0.079        | <b>0.296</b> | 0.245        | 0.130        | <b>0.177</b>         | 0.112        | 0.069        |
| Edema             | <b>0.362</b> | 0.240        | 0.203        | <b>0.388</b> | 0.345        | 0.266        | 0.073                | 0.062        | <b>0.099</b> |
| Enlarged Cardiom. | <b>0.379</b> | 0.272        | 0.065        | <b>0.400</b> | 0.382        | 0.295        | <b>0.154</b>         | 0.152        | 0.094        |
| Lung Lesion       | <b>0.101</b> | 0.066        | 0.003        | <b>0.089</b> | 0.069        | 0.045        | <b>0.107</b>         | 0.063        | 0.001        |
| Pleural Effusion  | <b>0.235</b> | 0.204        | 0.120        | <b>0.195</b> | 0.176        | 0.090        | 0.088                | <b>0.091</b> | 0.067        |
| Pneumothorax      | <b>0.213</b> | 0.171        | 0.088        | <b>0.216</b> | 0.184        | 0.124        | 0.077                | 0.070        | <b>0.078</b> |
| Support Devices   | <b>0.163</b> | 0.147        | 0.116        | <b>0.133</b> | 0.126        | 0.099        | <b>0.099</b>         | 0.074        | 0.066        |
| hit rate          |              |              |              |              |              |              |                      |              |              |
| Airspace Opacity  | <b>0.498</b> | 0.428        | 0.106        | <b>0.558</b> | 0.522        | 0.148        | <b>0.606</b>         | 0.586        | 0.122        |
| Atelectasis       | <b>0.501</b> | 0.490        | 0.062        | <b>0.621</b> | <b>0.621</b> | 0.118        | <b>0.520</b>         | 0.453        | 0.187        |
| Cardiomegaly      | 0.903        | <b>0.915</b> | 0.126        | <b>0.732</b> | 0.297        | 0.493        | 0.697                | <b>0.748</b> | 0.268        |
| Consolidation     | 0.738        | <b>0.797</b> | 0.030        | <b>0.708</b> | 0.600        | 0.284        | <b>0.624</b>         | 0.538        | 0.115        |
| Edema             | <b>0.746</b> | 0.432        | 0.385        | <b>0.781</b> | 0.745        | 0.457        | 0.300                | <b>0.350</b> | 0.180        |
| Enlarged Cardiom. | <b>0.818</b> | 0.627        | 0.030        | 0.630        | 0.631        | <b>0.731</b> | 0.704                | <b>0.730</b> | 0.205        |
| Lung Lesion       | <b>0.290</b> | 0.146        | 0.000        | <b>0.290</b> | 0.146        | 0.000        | <b>0.423</b>         | 0.211        | 0.000        |
| Pleural Effusion  | <b>0.507</b> | 0.499        | 0.133        | 0.347        | <b>0.473</b> | 0.107        | 0.332                | <b>0.400</b> | 0.182        |
| Pneumothorax      | 0.392        | <b>0.600</b> | 0.000        | 0.489        | <b>0.698</b> | 0.097        | <b>0.801</b>         | 0.498        | 0.097        |
| Support Devices   | <b>0.355</b> | 0.287        | 0.133        | <b>0.364</b> | 0.334        | 0.150        | <b>0.491</b>         | 0.442        | 0.324        |

853  
854  
855  
856  
857

**Extended Data Fig. 3 | Test set localization performance for each combination of saliency method and CNN architecture.** For each pathology and saliency method, we highlight the highest performing CNN architecture in **bold**.

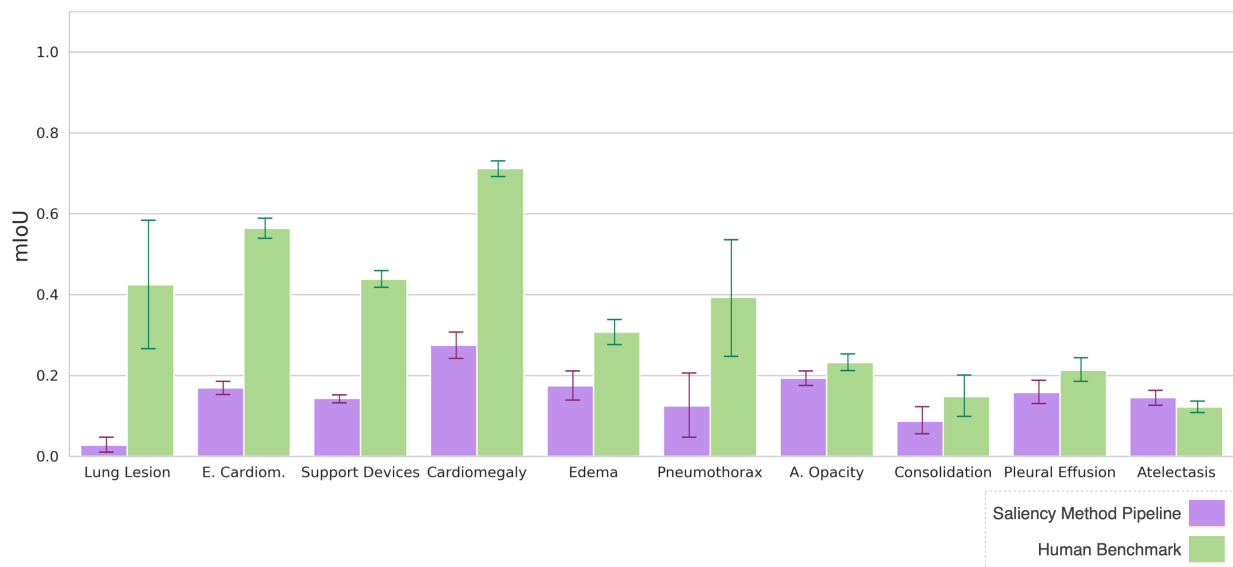

858  
859 **Extended Data Fig. 4 | Saliency method pipeline localization performance on the**  
860 **full dataset using mIoU.** True negatives (CXR's whose ground-truth label is negative  
861 for a given pathology and for which there were neither human benchmark nor saliency  
862 method pipeline segmentations for that pathology) were excluded from the metric  
863 calculation. To control for false positives, we ensure that the final binary segmentation is  
864 consistent with model probability output by applying another layer of thresholding such  
865 that the segmentation mask produced all zeros if the predicted probability was below a  
866 chosen level. The probability threshold is searched on the interval of [0,0.8] with steps  
867 of 0.1. The exact value is determined per pathology by maximizing the mIoU on the  
868 validation set. We found that on the full dataset, for seven of the 10 pathologies, the  
869 saliency method pipeline had a significantly lower mIoU than the human benchmark.  
870

| pathology         | human benchmark mIoU | saliency method pipeline mIoU | % decrease (95% CI)  |
|-------------------|----------------------|-------------------------------|----------------------|
| Lung Lesion       | 0.426                | 0.101                         | 76.2 (59.1, 87.5)    |
| Support Devices   | 0.444                | 0.163                         | 63.3 (60.8, 65.8)    |
| Pneumothorax      | 0.435                | 0.213                         | 51.0 (14.6, 69.5)    |
| Cardiomegaly      | 0.720                | 0.452                         | 37.2 (34.0, 40.4)    |
| Enlarged Cardiom. | 0.569                | 0.379                         | 33.4 (29.0, 37.4)    |
| Airspace Opacity  | 0.260                | 0.248                         | 4.6 (-5.8, 14.6)     |
| Pleural Effusion  | 0.219                | 0.235                         | -6.8 (-25.6, 13.3)   |
| Edema             | 0.335                | 0.362                         | -7.4 (-16.4, 2.6)    |
| Atelectasis       | 0.124                | 0.254                         | -51.2 (-57.3, -43.9) |
| Consolidation     | 0.179                | 0.408                         | -56.1 (-69.4, -42.7) |
| Average           | 0.383                | 0.281                         | 26.6 (18.1, 35.0)    |

871  
872 **Extended Data Fig. 5 | Percentage decrease from human benchmark mIoU to**  
873 **saliency method pipeline mIoU.** Pathologies are sorted first by statistical significance  
874 of percentage decrease from human benchmark mIoU to saliency method pipeline  
875 mIoU (high to low), and then by percentage decrease from human benchmark mIoU to  
876 saliency method pipeline mIoU (high to low). We use 95% bootstrap confidence interval.  
877

| pathology         | human benchmark hit rate (%) | saliency method pipeline hit rate (%) | % decrease (95% CI) |
|-------------------|------------------------------|---------------------------------------|---------------------|
| Lung Lesion       | 0.850                        | 0.290                                 | 65.9 (35.3, 91.7)   |
| Support Devices   | 0.933                        | 0.355                                 | 62.0 (56.2, 67.5)   |
| Pneumothorax      | 1.000                        | 0.392                                 | 60.8 (27.3, 92.3)   |
| Atelectasis       | 0.870                        | 0.501                                 | 42.4 (0.3, 0.5)     |
| Pleural Effusion  | 0.718                        | 0.507                                 | 29.4 (14.3, 42.5)   |
| Enlarged Cardiom. | 0.957                        | 0.818                                 | 14.5 (9.6, 19.2)    |
| Cardiomegaly      | 0.972                        | 0.903                                 | 7.1 (2.1, 11.8)     |
| Airspace Opacity  | 0.559                        | 0.498                                 | 10.9 (-2.0, 23.1)   |
| Edema             | 0.769                        | 0.746                                 | 3.0 (-11.7, 18.5)   |
| Consolidation     | 0.510                        | 0.738                                 | -44.7 (-56.5, 0.5)  |
| Average           | 0.820                        | 0.580                                 | 29.4 (15.0, 43.2)   |

878  
879 **Extended Data Fig. 6 | Percentage decrease from human benchmark hit rate to**  
880 **saliency method pipeline hit rate.** Pathologies are sorted first by statistical  
881 significance of percentage decrease from human benchmark hit rate to saliency method  
882 pipeline hit rate (high to low), and then by percentage decrease from human benchmark  
883 hit rate to saliency method pipeline hit rate (high to low). We use 95% bootstrap  
884 confidence interval.  
885

| pathology         | ensemble model | single checkpoint |
|-------------------|----------------|-------------------|
| mIoU              |                |                   |
| Airspace Opacity  | <b>0.248</b>   | 0.241             |
| Atelectasis       | <b>0.254</b>   | 0.233             |
| Cardiomegaly      | <b>0.452</b>   | 0.419             |
| Consolidation     | <b>0.408</b>   | 0.369             |
| Edema             | <b>0.362</b>   | 0.360             |
| Enlarged Cardiom. | <u>0.379</u>   | 0.297             |
| Lung Lesion       | <b>0.101</b>   | 0.099             |
| Pleural Effusion  | <b>0.235</b>   | 0.205             |
| Pneumothorax      | <b>0.213</b>   | 0.181             |
| Support Devices   | <b>0.163</b>   | 0.150             |
| hit rate          |                |                   |
| Airspace Opacity  | 0.498          | <b>0.534</b>      |
| Atelectasis       | 0.501          | <b>0.504</b>      |
| Cardiomegaly      | <b>0.903</b>   | 0.846             |
| Consolidation     | <b>0.738</b>   | 0.711             |
| Edema             | 0.746          | <b>0.749</b>      |
| Enlarged Cardiom. | <u>0.818</u>   | 0.704             |
| Lung Lesion       | <b>0.290</b>   | 0.286             |
| Pleural Effusion  | <b>0.507</b>   | 0.390             |
| Pneumothorax      | 0.392          | <b>0.491</b>      |
| Support Devices   | <b>0.355</b>   | 0.312             |

886  
 887 **Extended Data Fig. 7 | Saliency method pipeline localization performance using**  
 888 **an ensemble model vs. using the top performing single checkpoint for each**  
 889 **pathology.** For each pathology, we highlight in **bold** the model (ensemble or single  
 890 checkpoint) that has the higher metric, and we underline it if the difference is statistically  
 891 significant (using 95% bootstrap confidence interval).  
 892

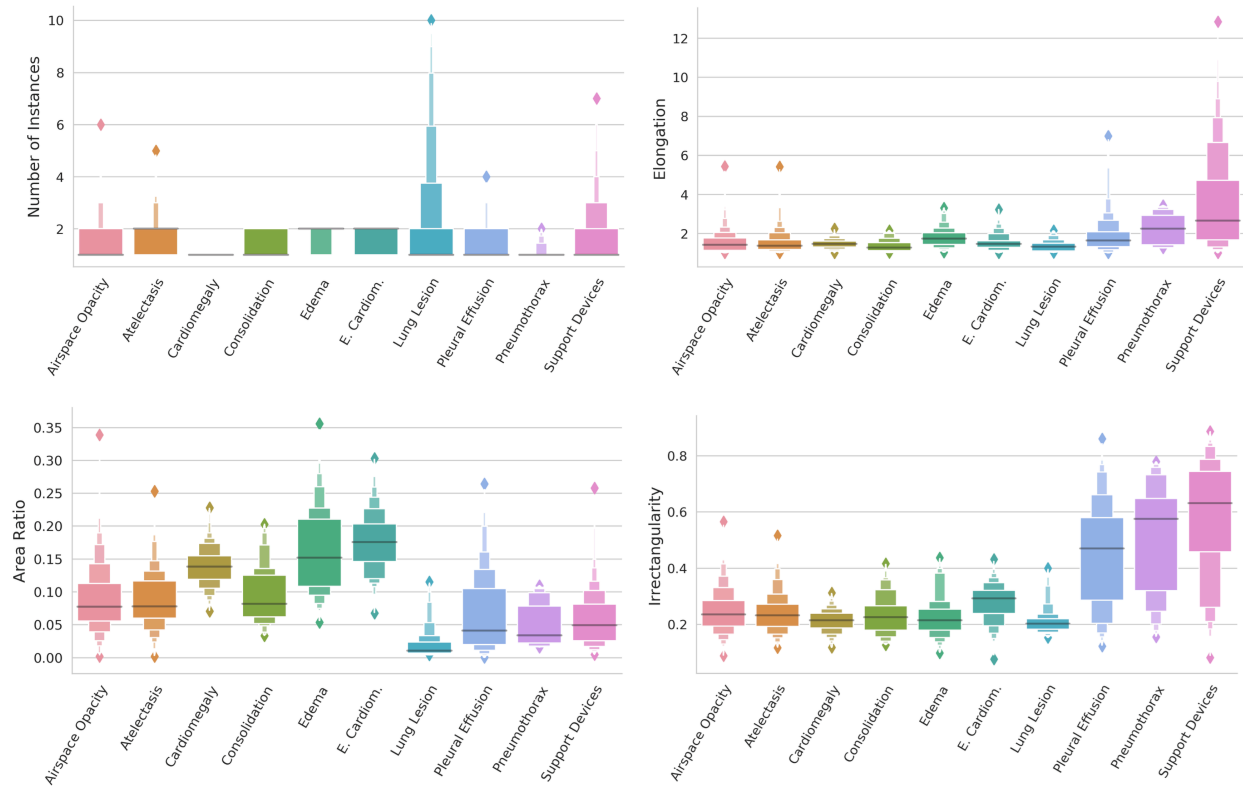

893  
894 **Extended Data Fig. 8 | Distribution of four geometric features across all 10**  
895 **pathologies.** The black horizontal line in each box indicates the median feature value  
896 for that pathology, and each successive level outward contains half of the remaining  
897 data. The height of the box indicates the range of feature values in the quantile.  
898



| pathology         | CXRs ( <i>n</i> ) | Linear regression coefficient | Spearman correlation coefficient |
|-------------------|-------------------|-------------------------------|----------------------------------|
| Airspace Opacity  | 381               | 0.498***                      | 0.160**                          |
| Atelectasis       | 296               | 0.443**                       | 0.126                            |
| Cardiomegaly      | 229               | 0.195*                        | 0.185*                           |
| Consolidation     | 120               | 0.082                         | 0.199                            |
| Edema             | 124               | 0.195                         | 0.132                            |
| Enlarged Cardiom. | 668               | 0.548**                       | 0.253***                         |
| Lung Lesion       | 50                | 0.540                         | 0.453                            |
| Pleural Effusion  | 159               | 0.654***                      | 0.278**                          |
| Pneumothorax      | 11                | 0.210                         | 0.142                            |
| Support Devices   | 327               | -0.058                        | -0.029                           |
| All pathologies   | 2365              | -0.411***                     | -0.239***                        |

\* p-value < 0.05, \*\* p-value < 0.01, \*\*\* p-value < 0.001

899  
900  
901  
902

**Extended Data Fig. 9 | Hit rate: Coefficients from regressions on model assurance.**

| <b>sample size</b>      |                 |
|-------------------------|-----------------|
| Number studies          | 500             |
| Number CXRs             | 668             |
| <b>pathology</b>        | <b>CXRs (n)</b> |
| Airspace Opacity        | 309             |
| Atelectasis             | 177             |
| Cardiomegaly            | 175             |
| Consolidation           | 35              |
| Edema                   | 83              |
| Enlarged Cardiom.       | 297             |
| Lung Lesion             | 14              |
| Pleural Effusion        | 120             |
| Pneumothorax            | 10              |
| Support Devices         | 314             |
| No pathology identified | 169             |

903  
904

**Extended Data Fig. 10 | Test set summary statistics.**
